# 1 **Multifractality in postural sway supports quiet eye training in** 2 **aiming tasks: A study of golf putting**

3  
4 Noah Jacobson<sup>1</sup>, Quinn Berleman-Paul<sup>1</sup>, Madhur Mangalam<sup>2</sup> and Damian G. Kelty-Stephen<sup>1</sup>

6 <sup>1</sup>Department of Psychology, Grinnell College, Grinnell, IA 50112, USA

7 <sup>2</sup>Department of Physical Therapy, Movement and Rehabilitation Sciences, Northeastern University,  
8 Boston, MA 02115, USA

9  
10 Author for correspondence:

11 Damian G. Kelty-Stephen

12 e-mail: [keltysda@grinnell.edu](mailto:keltysda@grinnell.edu)

13  
14 **Ethics statement.** All participants provided verbal and written informed consent approved by the  
15 Institutional Review Board (IRB) at Grinnell College (Grinnell, IA).

16 **Data accessibility.** All data analyzed in the present study are available upon request.

17 **Author contributions:** N.J., Q.B-P., and D.G.K-S. conceived and designed research; N.J., Q.B-P., and  
18 D.G.K-S. performed experiments; N.J., Q.B-P., and D.G.K-S. analyzed data; N.J., Q.B-P., M.M., and  
19 D.G.K-S. interpreted results of experiments; M.M. and D.G.K-S. prepared figures; N.J. and D.G.K-S.  
20 drafted manuscript; N.J., Q.B-P., M.M., and D.G.K-S. edited and revised manuscript; N.J., Q.B-P.,  
21 M.M., and D.G.K-S. approved final version of manuscript.

22 **Competing interests.** The authors have no competing interests to declare.

## 23 24 **Supplementary materials**

25 **Supplementary Table S1.** Subset of Poisson regression model output including main and interaction  
26 effects of time and perturbation of eye height.

## 27 **Abstract**

28 The ‘quiet eye’ (QE) approach to visually-guided aiming behavior invests fully in perceptual  
29 information's potential to organize coordinated action. Sports psychologists refer to QE as the stillness  
30 of the eyes during aiming tasks and increasingly into self- and externally-paced tasks. Amidst the  
31 ‘noisy’ fluctuations of the athlete’s body, quiet eyes might leave fewer saccadic interruptions to the  
32 coupling between postural sway and optic flow. Multifractality in postural sway is a robust predictor of  
33 both visual and haptic perceptual responses. Postural sway generates optic flow centered on an  
34 individual’s eye height. So, we manipulated the eye height part way through a golf-putting task for  
35 participants trained in QE or trained technically as per conventional golf putting. We predicted that  
36 perturbing the eye height by attaching wooden blocks below the feet would perturb the putting more so  
37 in QE-trained participants than in those trained technically. We also predicted that responses to this  
38 perturbation would depend on multifractality in postural sway. Specifically, we predicted that less  
39 multifractality would predict more adaptive responses to the perturbation and higher putting accuracy.  
40 Results supported both predictions. QE training and lower multifractality led to more frequent  
41 successful putts, and the perturbation of eye height led to less frequent successful putts, particularly for  
42 QE-trained participants. Models of radial error (i.e., the distance between the ball’s final position and  
43 the hole) indicated that lower estimates of multifractality due to nonlinearity coincided with a more  
44 adaptive response to the perturbation. These results challenge the past suggestions that reduced  
45 multifractality might be a signature of diseased posture. Instead, they suggest that reduced  
46 multifractality may act in a context-sensitive manner to restrain motoric degrees of freedom to achieve  
47 the task goal.

48 **Keywords:** biotensegrity, degree of freedom, fractal, posture, tensegrity, visual adaptation

## 49 1. Introduction

50 Aiming our behaviors into the visible world requires an ongoing awareness of how our body fits in the  
51 world around it. The difficulty of sorting out this bodily fit finds its classic encoding in the ‘degrees of  
52 freedom’ problem: an explicit choreography of goal-directed movement that stipulates all individual  
53 motoric degrees of freedom at fine ‘grains’ proves daunting and probably too rigid to be adapted to  
54 change in task or context [1]. However, another perspective suggests that the abundance of degrees of  
55 freedom is not a problem but a ‘blessing’ [2]. According to this view, there is no infinitude of motoric  
56 variables to stipulate at very fine grains, and on the contrary, task or intention organizes the movement  
57 system at the relatively coarse grain of the whole body and context [3]. This positive view of motor  
58 abundance appears in recent studies of aiming behaviors like the golf swing, whereby a clearly defined  
59 target in the context draws visual attention away from specific postures of the body, and indeed,  
60 experts with their eyes on the target show no single optimized mode of execution [4]. Hence, instead of  
61 requiring explicit choreography, the movement system’s organization may readily emerge from  
62 perceptual linkages to the surrounding context [5–7].

### 63 1.1. Quiet eye versus technical training

64 Supporting task performance by emphasizing perceptual linkages versus explicit choreography is a  
65 clear theme of research on ‘quiet eye’ (QE). Sports psychologists refer to QE as the stillness of the eyes  
66 during aiming tasks, specifically the final gaze fixation 100 ms in duration within 3 degrees of visual  
67 angle immediately before the movement is initiated [8]. In the case of a golf swing, ‘technical training’  
68 that communicates an explicit choreography of the arm and leg placement leads to less accuracy than a  
69 ‘quiet eye’ (QE) strategy. Experts show more frequent and longer gaze fixations on specific aspects of  
70 the putting situation (e.g., golf ball, putting surface, target hole). Novices tend to fixate more  
71 introvertedly (e.g., on the clubhead during the backswing phase) and focus on the ball only after it has  
72 been hit with the club [9–13]. Visual guidance by focusing on the target leads to a more effective golf  
73 swing than technical training of the postures and limb movements composing a golf swing. Indeed, in  
74 contrast with technical training, QE training of golf putting leads to improved putting accuracy as well  
75 as to a reduction in heart rate and muscle activity at the moment of impact [11]. Thus, it is believed that  
76 instructing athletes by directing their perceptual linkages outward to the visual field supports higher  
77 task performance as well as leads to more expert-like movement and physiology.

78 QE research opens a fascinating vantage point to situate ongoing research on linkages  
79 anchoring organisms to their visual contexts and the synergies transforming visual information into  
80 action (e.g., [14–16]). Research on QE has mostly examined the visual-cognitive bases for the  
81 relatively more extraverted gaze into the task context [8,17,18], and the relationship of QE to the body,  
82 the brain, and the nervous system has received relatively less attention [19–21]. To fill this gap, a  
83 ‘postural-kinematic hypothesis’ has begun to complement the canonical ‘visual hypothesis’ that QE  
84 was a primarily visual-cognitive mechanism [22]. So far, this postural-kinematic hypothesis  
85 emphasizes only slower movement times, that is, longer duration offering the foundation for longer  
86 fixations. This postural-kinematic hypothesis is a constructive first step. In this study, we aim to embed  
87 more of the postural dynamics into this hypothesis, beyond simply movement duration. Additionally,  
88 instead of reporting on gaze measurements, we will use QE as a training manipulation and focus on  
89 investigating how postural sway supports the effect of the training.

### 90 1.2. Optic flow and postural sway can support the quiet eye strategy

91 A crucial consideration for postural-kinematic contributions to visually guided tasks is optic flow [5–  
92 7]. Amidst the ‘noisy’ fluctuations of the athlete’s body, quieting the eyes might leave fewer saccadic  
93 interruptions to the coupling between optic flow and postural sway. Optic flow consists of the  
94 differential expansion, contraction, or rotation of visible objects and surfaces as an individual moves

95 about. It is specific to both the individual's movement and the contextual layout of objects and  
96 surfaces. Indeed, virtual visual displays that impose artificial optic flow also engender anticipatory  
97 behaviors (e.g., steering, braking) as if the objects and surfaces entailed by the optic flow are out there  
98 —not just for humans but for other animal species and even robots [23]. Although most prominent in  
99 locomotion-related contexts, postural sway is no less capable of generating informative optic flow in  
100 non-locomotion contexts [24]. Because research on QE has mostly focused on the fixation of the eye  
101 gaze, QE's relationship to optic flow remains a critical gap [25].

102 The present work aims to replicate the beneficial effects of QE on putting performance, and  
103 more importantly, to understand how eye height and optic flow might support QE. Specifically,  
104 assuming that QE might depend on the optic flow, we aim to test whether perturbing the optic flow  
105 parameter of eye height perturbs the effect of QE training in golf putting more so than technical  
106 training. Indeed, experimentally varying eye height is known to complicate optic flow in ways that  
107 briefly perturbs visual perception (e.g., [26]). We used a single session in the style of Moore et al.'s  
108 [11] golf-putting training paradigm to test for rapid attunement to changes in information from optic  
109 flow and postural sway. For instance, manipulating eye height by adding wooden blocks to  
110 participants' shoes alters their affordance judgments significantly, leading to an initial underestimation  
111 of the optimal climbing height for a stair and sitting height for a chair. However, participants adjust to  
112 the new eye height and make more accurate decisions later on [27,28]. Hence, we expect that adding  
113 wooden blocks—(henceforth, 'clogs', to distinguish from 'blocks' of experimental trials)—to the feet  
114 might upset putting accuracy in the QE-trained participants initially, but that this accuracy will rebound  
115 as participants adjust to new eye height [8].

### 116 **1.3. Multiscaled organization of postural sway entails a multifractal structure**

117 Besides our manipulation of eye height, our expectations about the optic-flow foundation for QE also  
118 include a hypothesis about how postural sway should moderate the effects of perturbed eye height. If  
119 optic flow supports QE, we expect that QE-trained response to eye height perturbation will depend on  
120 postural sway. Indeed, in the affordance research on reattunement to perturbation of eye height,  
121 postural sway supported the adaptation of the relationship of eye height to judgments of optimal chair  
122 height for sitting [28]. However, it was not simply that more sway facilitated this adaptation because,  
123 for instance, an 'awkward stance' requiring more compensatory postural adjustments did not support  
124 visual adaptation as much as comfortable standing did. An additional challenge in identifying what  
125 portion of sway could support adaptation to altered eye height is that sway depends on events at  
126 multiple timescales. At longer scales, QE training itself might influence sway by training an explicit  
127 use of visual information. At shorter timescales, adding clogs might destabilize posture initially, and  
128 then at the shortest timescales, sway might be implicated in adapting to this perturbation of eye height.  
129 Hence, judiciously accounting the sway's contribution to visual adaptation due to perturbation of eye  
130 height requires an appreciation of sway's multi-scaled organization.

131 The multi-scaled organization of sway may itself reveal a key to predicting—if not explaining  
132 —how the movement system adapts its visually-guided actions. Interactions across multiple timescales  
133 noted above are currently understood to entail a 'multifractal' structure in sway. Multifractality refers  
134 to multiple (i.e., 'multi-') relationships between fluctuations and timescales, with these relationships  
135 following power laws with potentially fractional (i.e., '-fractal') exponents. Interactions across  
136 timescales engender a nonlinear patterning of fluctuations that multifractal analysis is well-poised to  
137 diagnose and quantify [29]. Specifically, multifractal analysis estimates a spectrum of fractal exponents  
138 whose width  $W_{MF}$  quantifies multifractality. When we compare measured series'  $W_{MF}$  to spectrum  
139 widths of a set of best-fitting linear models ('linear surrogates') of those series, multifractal evidence of  
140 nonlinearity manifests as a significant difference between  $W_{MF}$  for the original series and the average  
141  $W_{MF}$  for linear surrogates. The  $t$ -statistic,  $t_{MF}$ , comparing the original series'  $W_{MF}$  to the surrogates'  $W_{MF}$

142 serves as an estimate of how much multifractality in the original series is due to nonlinear interactions  
143 across timescales.

#### 144 **1.4. Multifractal nonlinearity predicts perceptual responses to perturbations of task constraints**

145 Multifractality,  $W_{MF}$ , in postural sway is a robust predictor of perceptual responses in both visual and  
146 haptic media [30–32]. Multifractal nonlinearity,  $t_{MF}$ , in postural sway predicts perceptual responses as  
147 well, not just in the case of nonvisual judgments of length and heaviness of manually-wielded objects  
148 [33] but also in visuomotor tasks [34,35] and in response to perturbations, such as those due to  
149 prismatic goggles in a visual aiming task [36]. Now, we aim to test whether  $t_{MF}$  can predict the  
150 responses to perturbations of eye height in QE-trained golf putting.

151 We expected that postural sway most robust to the perturbation of eye height would show  
152 relatively narrow multifractal spectra that would still differ significantly from those of the surrogates.  
153 So far, postural sway shows relatively narrower multifractal spectra (i.e., smaller  $W_{MF}$ ) for younger  
154 participants [37], those less likely to experience motion sickness [38], and those focusing on more  
155 proximal surfaces in optic flow [39]. Hence, greater  $W_{MF}$  in postural sway might counteract any effects  
156 of QE. All these findings are qualified by a failure of  $W_{MF}$  to correlate with canonical measures of sway  
157 like standard deviation. However, postural stability is only ambiguously related to the standard  
158 deviation of sway, requiring neither too much nor too little variability in sway [40,41]. Meanwhile,  
159 both empirical and theoretical work suggests that  $t_{MF}$  is more closely related to postural stabilizing.  
160 Evidence shows that postural stabilization following a perturbation to the base of support shows a rapid  
161 reduction of  $t_{MF}$  [42]. The theoretical simulation also predicts that random perturbations to individual  
162 scales of a nested system lead to multifractality due to nonlinearity and narrower multifractal spectra  
163 (i.e., smaller  $W_{MF}$  and smaller-yet-significant  $t_{MF}$ ; [43]). Hence, incorporating the visual information  
164 due to the perturbation of eye height adaptively into the movement system must involve exhibiting  
165 smaller-yet-significant  $t_{MF}$ .

#### 166 **1.5. Golf-putting task and hypotheses**

167 The participants were instructed to take golf putts towards a circular, hole-sized target painted on a  
168 green putting surface in the laboratory—over four blocks of ten trials each. One group received QE  
169 training, and the other group received technical training specifying how to move their limbs to make  
170 the golf putt. Wooden clogs were attached to the feet of all participants to perturb their eye height.  
171 Putting performance was treated both dichotomously (i.e., ‘making’ or ‘missing’ the putt) and  
172 continuously (i.e., in terms of radial error). We tested hypotheses specific to these two treatments.

##### 173 **1.5.1. Hypothesis-1: Effects on dichotomous treatment of putting performance**

174 Putting performance was dichotomized as a ‘make’ when the golf ball came to rest within the target or  
175 2 feet directly beyond it, and as a ‘miss’ in all other cases. We predicted that QE training would lead to  
176 more ‘makes’ (Hypothesis-1a) and that the eye height perturbation due to clogs would lead to more  
177 misses following QE training than technical training (Hypothesis-1b). We also predicted that greater  
178 sway  $W_{MF}$  would lead to fewer ‘makes’ (Hypothesis-1c).

##### 179 **1.5.2. Hypothesis-2: Effects on continuous treatment of putting performance**

180 Putting performance was treated continuously in terms of unsigned radial distance from the target (i.e.,  
181 unsigned radial error). We hypothesized that the eye height perturbation due to clogs would lead to  
182 lower putting accuracy characterized by higher unsigned radial error following QE training than  
183 technical training. In contrast to logistic modeling of a dichotomous dependent variable, which is  
184 limited by the number of valid predictors (e.g., [44]), a continuous dependent variable allows testing  
185 more complex hypotheses. We predicted that the above effects of clogs on QE would depend on the  
186 multifractal nonlinearity,  $t_{MF}$ , of sway beyond any effects of multifractality (i.e.,  $W_{MF}$ ) alone

187 (Hypothesis-2a). We also predicted that lower  $t_{MF}$  of sway would be associated with more flexible  
188 responses to the eye height perturbation, leading to a gradual increase but a subsequent decay of radial  
189 error across trials within the blocks with the clogs on (Hypothesis-2b).

190

## 191 **2. Methods**

### 192 **2.1. Participants**

193 Twenty undergraduate students (11 women, *mean*±*s.d.* age = 19.5±1.2 years, all right-handed [45])  
194 with normal or corrected vision participated in this study. All participants provided written informed  
195 consent approved by the Institutional Review Board (IRB) at Grinnell College (Grinnell, IA).

### 196 **2.2. Procedure**

197 In an hour-long session, the participants completed a single putt on each of 40 trials. Prior to the  
198 training trials, half of the participants received QE instructions (Table 1, left column) while the other  
199 half received technical putting instruction (Table 1, right column), replicating Moore et al.'s [11]  
200 methodology. The technical instructions mirrored the QE instructions but did not describe the eye-  
201 related behaviors, hence mimicking standard golf instructions. After verbally confirming that they  
202 understood the instructions, the participants watched a video demonstrating a QE-specific putting  
203 stroke (<https://www.youtube.com/watch?v=lfWuL1klbsY&feature=youtu.be>) or a standard putting  
204 stroke (<https://www.youtube.com/watch?v=HOYZn4MYmDI>). The researcher directed the quiet-eye  
205 trained participants to the key features of the golfer's gaze control and the technically-trained  
206 participants to the putting mechanics.

207 The participant performed the golf putts on a 6×15 feet standard indoor All Turf Mats™  
208 artificial turf mat using a 1.68-inch diameter PING Sigma 2 Anser Stealth™ putter and regular-sized  
209 white golf balls. The participants completed straight putts ten feet away towards a 2.5-inch diameter  
210 circular orange dot, designed to fit the golf ball. This format allowed for more stringent measurement  
211 and gave the participants a more focused target.

212 The participants completed 20 training trials (treated as two blocks of 10 trials per block in  
213 regression modeling). Following a short 5-minute break, the participants completed two blocks of ten  
214 test trials per block (i.e., 20 test trials total) in the absence of instructions. The participants were  
215 randomly assigned to complete either their first or second block of ten trials while wearing 5-cm-raised  
216 wooden blocks (i.e., clogs) attached to their shoes (they completed the other block of ten test trials  
217 under the same conditions as the 20 training trials). Before the testing began, the participants were  
218 allowed to walk around and adjust to the clogs to reduce fall risk.

### 219 **2.3. Measures**

220 The task performance was defined in terms of the radial error (the distance from the target at which the  
221 ball stopped, in feet) and the number of putts successfully 'holed.' Because the target was not a real  
222 hole, the putt was counted as holed in either of two events: the ball came to rest within the orange dot  
223 on the floor or within 2 feet directly beyond the hole. In either of these cases, the radial error was  
224 recorded as zero [46,47]. Postural sway was measured using a smartphone with the Physics Toolbox  
225 Suite application (<http://vieryasoftware.net>) strapped to the participants' lower back. The app recorded  
226 the acceleration of the torso along  $x$ -,  $y$ -, and  $z$ -dimensions at 100 Hz. An experimenter manually  
227 started and stopped recording for each putt. Recording began after the participant set up over the ball  
228 and stopped once the ball stopped moving.

### 229 **2.4. Multifractal analysis**

#### 230 **2.4.1 Multifractal spectrum width of accelerometer displacement series**

231 For each putt, we computed an accelerometer displacement series for multifractal analysis as follows.  
232 The accelerometer data encodes an  $N$ -length series of accelerations of the torso along  $x$ -,  $y$ -, and  $z$ -  
233 dimensions centered on an origin on the smartphone. A displacement series of length  $N-1$  was  
234 computed by: 1) taking the first differences for the variable (e.g., if we use the letters  $i$  and  $j$  to indicate  
235 individual values in sequence,  $x_{diff}(j)=x(i)-x(i-1)$  for each  $i$ th value of  $x$ , for  $2<i<N$ ,  
236  $1<j=i-1<N-1$ , 2) squaring and summing the differences of each dimension's displacements (i.e.,  
237  $x_{diff}^2+y_{diff}^2+z_{diff}^2$ ), and 3) taking the square root of this sum (i.e.,  $\sqrt{(x_{diff}^2+y_{diff}^2+z_{diff}^2)}$ ).

238 Multifractal spectra  $f(\alpha)$  were estimated for each accelerometer displacement series, using  
239 Chhabra and Jensen's [48] method. The first step was to partition the series into subsets (or 'bins') of  
240 various sizes, from four points to a fourth of series' length (figure 1, left). The second step was to  
241 examine how the proportion of displacements within each bin changed with bin size or timescale  
242 (figure 1, right). The third step was to estimate two distinct exponents: an exponent  $\alpha$  describing  
243 how the average proportion grows with bin size and an exponent  $f$  describing how Shannon's [49]  
244 entropy of bin proportion changes with bin size. The later steps were all iterations of this third step,  
245 calculating a mass  $\mu$  by applying an exponent  $q$  to bin proportions and using  $\mu(q)$  to weight  
246 proportions selectively according to proportion size.  $q$  greater than 1 weights larger-proportion bins,  
247 and  $q$  lesser than 1 weights smaller-proportion bins (figure 2, left).  $q$ -based mass  $\mu(q)$ -  
248 weighting generalizes single  $\alpha$  and  $f$  estimates from earlier steps into continual  $\alpha(q)$  and  
249  $f(q)$ —with  $\alpha(q)$  describing how mass-weighted average bin proportion changes with bin size  
250 and  $f(q)$  describing how Shannon's entropy of bin masses  $\mu(q)$  with bin size (figure 2, top  
251 right).

252 Multifractal analysis quantifies heterogeneity as variety in  $\alpha(q)$  and  $f(q)$ . The ordered  
253 pairs ( $\alpha(q)$ ,  $f(q)$ ) constitutes the multifractal spectrum (figure 2, bottom right). We included  
254  $\alpha(q)$  and  $f(q)$  only when mass-weighted proportions were defined and when both of their  
255 corresponding relationships to bin size correlated at  $r > 0.995$  on logarithmic plots, for bin sizes  
256 4, 8, 12, ...,  $N/4$  and  $-300 < q < 300$ , where  $N$  is the number of samples in the series.

## 257 2.4.2. Surrogate comparison

258 Multifractal spectrum width is sensitive to nonlinear interactions across timescales as well as to linear  
259 temporal structure. Hence, evidence of nonlinear interactions across timescales requires comparing the  
260 original series' multifractal spectrum width  $W_{MF}$  to those computed for a sample of linear surrogate  
261 series (figure 3). These linear surrogate series retain the same value as the original series but in a  
262 different order that preserves the original series' linear autocorrelation but destroys original sequence  
263 (i.e., iterative amplitude-adjusted Fourier-transform or IAAFT [29,50]; figures 4a to d). Comparing  
264  $W_{MF}$  of the original and surrogate series (figures 4e, f) produces a  $t$ -statistic  $t_{MF}$ , a measure of nonlinear  
265 interactions across timescales that is standardized across series with differing linear temporal structure.  
266  $t_{MF}$  was computed for each original series.

## 267 2.5. Mixed-effects modeling

268 The data were submitted to two kinds of mixed-effect modeling, namely, logistic and Poisson, using  
269 the 'glmer' function in R package *lme4* [51]. The subsequent subsections provide details of the  
270 predictors and the models.

### 271 2.5.1. Effects of time

272 The effects of time were modeled using trial number within a block ( $\text{trial}_{\text{block}}$ ), block number (block),  
273 and interactions of trial number with block number ( $\text{trial}_{\text{block}} \times \text{block}$ ), and trial number across blocks  
274 ( $\text{trial}_{\text{exp}}$ ). The model used orthogonal polynomials of each of both predictors up to 3<sup>rd</sup> order (i.e., cubic).

275 The primary reason for the polynomial terms was to reveal how and when the perturbation of wearing  
276 clogs might manifest and consequently subside. Cubic polynomials allow the simplest way to  
277 accomplish this goal by allowing a peak and a flat, quiescent portion as part of the same continuous  
278 function. Additionally, unlike the quadratic function, the cubic peak is not required to be symmetric  
279 and occurring at the midpoint. Hence, the cubic function controls for any nonlinearities in the normal  
280 course of trials without such perturbations. Whereas block is a linear effect across blocks, including  
281  $\text{trial}_{\text{exp}}$  in the model allowed controlling for nonlinear change across blocks.

282 There are two important features to note about the treatment of time in this model. First, the  
283 Poisson model encoded both classifications of trial numbers (i.e.,  $\text{trial}_{\text{exp}}$  and  $\text{trial}_{\text{block}}$ ) in terms of an  
284 orthogonal 3<sup>rd</sup>-order polynomial, using the function ‘poly’ in  $R$ , to include the linear, quadratic and  
285 cubic growth of trial number with all three terms phase-shifted so as to be uncorrelated with one  
286 another. Second, the lack of model convergence limited the appearance of block, such that block was  
287 neither treated nonlinearly nor in interaction with perturbation. Attempting to include the orthogonal  
288 3<sup>rd</sup>-order polynomials for block number led to a failure of model convergence, so block only appeared  
289 as a linear term. The model also failed to converge when it included interactions of block and  
290 perturbation because these two terms were strongly collinear.

### 291 2.5.2. Effects of manipulations

292 Manipulations included quiet-eye instruction, QE (QE = 1 for receiving QE instruction, and QE = 0 for  
293 not receiving QE instruction) and perturbation of eye height, perturbation (perturbation = 1 for all ten  
294 trials during the block when participants wore the clogs, and perturbation = 0 for all other trials).

### 295 2.5.3. Sway: Linear predictors

296 The accelerometer data encodes accelerations of the torso along  $x$ -,  $y$ -, and  $z$ -dimensions. Any single  
297 posture corresponds to a specific point in this 3D space. Hence, sway corresponds to the deviation of  
298 this 3D acceleration around the mean posture. The present analyses encoded this variability as  $MSD_{\text{acc}}$   
299 or  $RMS_{\text{acc}}$ , depending on which predictor supported a convergent model, along with mean and standard  
300 deviation of 3D displacement ( $Mean_{\text{disp}}$  and  $SD_{\text{disp}}$ , respectively).

### 301 2.5.4. Models

302 A mixed-effects logistic regression modeled the odds of a successful putt (i.e., a ‘make,’ vs. a ‘miss’),  
303 which included all putts ending with the golf ball coming to rest within the orange dot on the floor or  
304 within 2 feet directly beyond the hole. Predictors included QE  $\times$  perturbation (as well as lower-order  
305 component main effects QE and perturbation; e.g., [52]) to test Hypotheses-1a and -1b, and  $W_{\text{MF}}$  to test  
306 Hypothesis-1c, as well as block and  $RMS_{\text{acc}}$  to control for the effects of practice and linear structure of  
307 postural sway. Additional predictors did not significantly improve model fit and hence were omitted. A  
308 mixed-effects linear regression modeled the radial error (in inches) of all misses, with makes as defined  
309 above treated as having a zero radial error. Predictors for this second model included QE  $\times$  perturbation  
310  $\times$   $\text{trial}_{\text{block}}$   $\times$   $t_{\text{MF}}$  to test Hypothesis-2 by specifically addressing trials within each block, QE  $\times$   $\text{trial}_{\text{block}}$   
311 and QE  $\times$   $\text{trial}_{\text{exp}}$  to control for differences in learning due to QE across a linear progression of block; a  
312 nonlinear function of trials, QE  $\times$  perturbation  $\times$   $W_{\text{MF}}$   $\times$   $t_{\text{MF}}$ , to control for the effects of multifractal  
313 spectral width and its relationship with  $t_{\text{MF}}$ ; and  $MSD_{\text{acc}}$   $\times$   $Mean_{\text{disp}}$   $\times$   $SD_{\text{disp}}$  to control for the effects of  
314 linear description of sway.

315

## 316 3. Results

317 **3.1. Testing hypothesis-1: Odds of a make increased with QE, decreased with the perturbation of**  
318 **eye height, with a more negative effect of the perturbation for the QE group**



319 A mixed-effect logistic regression model of successful putting (i.e., the ‘makes’) returned the  
320 coefficients reported in Table 2. Predictors for  $t_{MF}$  and for interactions of QE with all terms other than  
321 perturbation failed to improve model fit significantly and so were omitted from the final model. This  
322 model failed to return an effect of QE ( $b = 0.20$ ,  $s.e.m. = 0.30$ ,  $p = 0.51$ ), failing to support Hypothesis-  
323 1a. The perturbation failed to show a significant effect of the perturbation alone ( $b = -0.22$ ,  $s.e.m. =$   
324  $0.43$ ,  $p = 0.60$ ). However, there was a moderately significant negative effect of QE  $\times$  perturbation ( $b =$   
325  $-1.16$ ,  $s.e.m. = 0.65$ ,  $p = 0.07$ ), suggesting that the participants instructed to use the QE strategy had  
326 marginally worse odds of a successful putt in the face of the perturbation, that is, 0.30 of the odds of  
327 non-QE participants in the face of the perturbation. This result gave only marginal support to  
328 Hypothesis-1b.

329 There were also effects of experience and trial-by-trial sway. Block had a positive effect ( $b =$   
330  $0.24$ ,  $s.e.m. = 0.13$ ,  $p = 0.06$ ), suggesting that odds of a successful putt was 1.27 times higher with each  
331 successive block of trials.  $RMS_{acc}$  showed a positive effect ( $b = 4.05$ ,  $s.e.m. = 1.34$ ,  $p < 0.0001$ ), and  
332 total multifractality  $W_{MF}$  showed a negative effect ( $b = -7.25$ ,  $s.e.m. = 2.94$ ,  $p < 0.0001$ ), suggesting that  
333 successful putts were more likely with more variable and less multifractal accelerations of sway. This  
334 latter result supported Hypothesis-1c.

### 335 3.2. Poisson modeling of radial error

336 A Poisson model of trial-by-trial radial error (i.e., the Euclidean distance of the ball’s final resting  
337 position from the hole’s center [in feet]) returned the coefficients in Supplementary Table S1.  
338 Supplementary Table S1 describes the coefficients for the effects of time, perturbation of eye height,  
339 and of interactions between the two. Table 3 describes the coefficients for trial-by-trial accelerations in  
340 postural sway, including linear descriptors ( $MSD_{acc} \times Mean_{disp} \times SD_{disp}$ ) and nonlinear descriptors  
341 ( $MSD_{acc} \times Mean_{disp} \times SD_{disp}$ , and QE  $\times$  perturbation  $\times$  trial<sub>block</sub>  $\times$   $t_{MF}$ ). The full model generated  
342 predictions that correlated with the observed trial-by-trial radial error,  $r = 0.54$ . Figure 5 plots the  
343 observed trial-by-trial radial error and trial-by-trial model predictions on the same axis for four  
344 participants each from the technical and QE-trained groups, respectively. We detail the effects of time  
345 and perturbation in the following sections. For brevity, we will only refer to significant coefficients in  
346 text.

#### 347 3.2.1. Non multifractal effects on radial error

348 This section details the non-multifractal effects described in Supplementary Table S1 and effects  
349 preliminary to the test of Hypothesis-2 in Table 3. Radial error grew linearly and quadratically across  
350 trials but showed negative cubic variation with trial—both for trials across the experiment and within a  
351 block (figure 5a). The QE strategy prompted steady decay of error across the experiment, canceling out  
352 the linear and cubic pattern of error over trials within a block (figure 5b). The perturbation of eye  
353 height elicited no main effect but increased the growth of error over trials within a block, with the QE  
354 instruction accentuating this nonlinear growth of error later in the block. The higher-order interaction  
355  $MSD_{acc} \times Mean_{disp} \times SD_{disp}$  and its main component effects and lower-order interactions showed mostly  
356 negative effects (only two of the two-way interactions showed positive coefficients), consonant with  
357 the positive effect for  $RMS_{acc}$  predicting greater accuracy in the logistic model (Section 3.1.).

#### 358 3.2.2. Total multifractality of sway, $W_{MF}$ , increased radial error, but multifractality due to 359 nonlinearity, $t_{MF}$ , attenuated radial error at the beginning and the end of blocks

360 Before considering what portion of multifractality is attributable to linear or nonlinear structure, the  
361 total width  $W_{MF}$  of original series’ multifractal spectra is associated with greater radial error ( $b =$   
362  $1.80 \times 10^0$ ,  $s.e.m. = 1.29 \times 10^{-1}$ ,  $p < 0.0001$ ). This result is incidentally supportive of Hypothesis-1c,  
363 resembling the negative effect on  $W_{MF}$  on the likelihood of a successful putt (Section 3.2.1.). We did  
364 not find any main effect of multifractality due to nonlinearity,  $t_{MF}$ , nor any interaction of  $W_{MF} \times t_{MF}$ .

365 However, the negative effect for  $t_{MF} \times \text{trial}_{\text{block}}$  (Quadratic;  $b = -8.93 \times 10^{-2}$ ,  $s.e.m. = 1.15 \times 10^{-2}$ ,  $p <$   
366  $0.0001$ ) indicated an association between multifractality due to nonlinearity with a significant reduction  
367 of the positive quadratic profile for radial error over trials within a block (i.e.,  $\text{trial}_{\text{block}}$ (Quadratic);  
368 Section 3.2.1.).

### 369 3.2.3. Testing Hypothesis-2a: Perturbation of eye height increased radial error only in 370 combination with QE training, with greater multifractality due to nonlinearity $t_{MF}$ , or with both

371 Much like the effect of trials within a block (Section 3.2.3.), the multifractality of sway  
372 promoted the tendency of QE to increase perturbation-related radial error. An important point to recall  
373 at this point is that, unlike in the logistic regression (Section 3.1.), neither did we find a main effect of  
374 perturbation nor an interaction effect of  $QE \times \text{perturbation}$ . Perturbation showed a significant effect  
375 through its interactions with other factors, the earliest being its interaction with  $\text{trial}_{\text{block}}$  (Section 3.2.3.);  
376 the interaction of  $\text{perturbation} \times W_{MF}$  ( $b = -1.50 \times 10^0$ ,  $s.e.m. = 3.12 \times 10^{-1}$ ,  $p < 0.0001$ ) canceled out the  
377 positive effect of  $W_{MF}$  on error (Section 3.2.2), suggesting that the perturbation reduced the error-  
378 eliciting effect of  $W_{MF}$ . The interaction  $QE \times W_{MF}$  reduced error by roughly half ( $b = -1.04 \times 10^0$ ,  $s.e.m.$   
379  $= 2.03 \times 10^{-1}$ ,  $p < 0.0001$ ), suggesting that QE promoted greater accuracy but only in the absence of  
380 perturbation. However, the interaction with multifractality indicates that QE increased the error  
381 attributable to the perturbation. For instance, the  $QE \times \text{perturbation} \times W_{MF}$  ( $b = 2.12 \times 10^0$ ,  $s.e.m. =$   
382  $4.91 \times 10^{-1}$ ,  $p < 0.0001$ ) reverses the apparently beneficial error-reducing interaction effect of  
383  $\text{perturbation} \times W_{MF}$ . Hence, QE reinstated the error due to total multifractality (Section 3.2.2), and it did  
384 so only in the face of the perturbation.

385 Above and beyond the effects of  $W_{MF}$  in moderating the interaction effect of  $QE \times \text{perturbation}$ ,  
386  $t_{MF}$  promoted the error-increasing effect of perturbation. Specifically, besides the moderating effect of  
387 QE on the effect of  $\text{perturbation} \times W_{MF}$ , perturbation elicited even greater radial error with increases in  
388  $t_{MF}$  ( $\text{perturbation} \times W_{MF} \times t_{MF}$ :  $b = 1.54 \times 10^{-1}$ ,  $s.e.m. = 3.15 \times 10^{-2}$ ,  $p < 0.0001$ ). QE did reverse this effect  
389 ( $QE \times \text{perturbation} \times W_{MF} \times t_{MF}$ :  $b = -2.21 \times 10^{-1}$ ,  $s.e.m. = 4.97 \times 10^{-2}$ ,  $p < 0.0001$ ). However, QE also  
390 increased error in combination with perturbation and  $t_{MF}$  even in the absence of any moderating effect  
391 of  $W_{MF}$  ( $QE \times \text{perturbation} \times t_{MF}$ :  $b = 8.62 \times 10^{-3}$ ,  $s.e.m. = 4.18 \times 10^{-3}$ ,  $p < 0.05$ ). This result supports  
392 Hypothesis-2a.

### 393 3.2.4. Testing Hypothesis-2b: the QE group with greater multifractal nonlinearity in sway 394 showed a greater initial but progressively slower increase in radial error due to the perturbation 395 of eye height

396 The interactions of  $QE \times \text{trial}_{\text{block}}$  with multifractal nonlinearity followed a similar but weaker pattern as  
397 the interactions of  $QE \times \text{trial}_{\text{block}}$  with perturbation. Much like the perturbation of eye height, the  
398 interaction of QE with  $t_{MF}$  accentuated the radial error late in a block of ten trials ( $QE \times \text{trial}_{\text{block}} \times t_{MF}$ ):  
399 it weakened the linear term ( $b = -3.73 \times 10^{-2}$ ,  $s.e.m. = 1.46 \times 10^{-2}$ ,  $p < 0.05$ ), contributing to a negative-  
400 quadratic peak in the middle of the block ( $b = -1.85 \times 10^{-1}$ ,  $s.e.m. = 1.66 \times 10^{-2}$ ,  $p < 0.0001$ ) and a  
401 positive cubic increase at the end of the block ( $b = 1.13 \times 10^{-1}$ ,  $s.e.m. = 1.73 \times 10^{-2}$ ,  $p < 0.0001$ ). Hence,  
402  $t_{MF}$  and perturbation showed independent effects on the progression of error across trials in block.

403 However, the similarity of these effects independently on error across trials within a block did  
404 not extend to their interaction. Indeed, most relevant to testing Hypothesis-2b is that the interaction of  
405 perturbation and  $t_{MF}$  served to speed up the growth of error, and QE slowed it down across the block.  
406 Coefficients for  $\text{perturbation} \times \text{trial}_{\text{block}} \times t_{MF}$  indicated that in the face of perturbation, multifractal  
407 nonlinearity removed the observed peak in error due to earlier negative quadratic effects ( $b = 3.83 \times 10^{-1}$ ,  
408  $s.e.m. = 5.28 \times 10^{-2}$ ,  $p < 0.0001$ ) and increased error across the linear ( $b = 4.07 \times 10^{-1}$ ,  $s.e.m. = 5.20 \times 10^{-2}$ ,  
409  $p < 0.0001$ ) and cubic terms ( $b = 5.39 \times 10^{-1}$ ,  $s.e.m. = 4.45 \times 10^{-2}$ ,  $p < 0.0001$ ). On the other hand,  
410 coefficients for  $\text{perturbation} \times \text{trial}_{\text{block}} \times t_{MF}$  indicated that, in the face of perturbation for the QE

411 participants, the linear increase was shallower ( $b = -2.71 \times 10^{-1}$ ,  $s.e.m. = 6.11 \times 10^{-2}$ ,  $p < 0.0001$ ), the  
412 positive quadratic growth further removed the observed peak in error ( $b = 4.24 \times 10^{-1}$ ,  $s.e.m. = 6.14 \times 10^{-$   
413  $^2$ ,  $p < 0.0001$ ), and the cubic term was negative ( $b = -7.90 \times 10^{-1}$ ,  $s.e.m. = 5.79 \times 10^{-2}$ ,  $p < 0.0001$ ).

414 The outcome of these differences distinguishes how multifractal nonlinearity predicted changes  
415 in adaptive responses to the perturbation of eye height. Greater  $t_{MF}$  exhibited less adaptive response to  
416 the perturbation in the QE case, and less-but-still-nonzero  $t_{MF}$  predicted a more gradual appearance of  
417 error and then a subsequent decay of this error. Greater  $t_{MF}$  led the QE group to exhibit initially greater  
418 error and a smaller change in error across trials, and lower levels of  $t_{MF}$  led the QE group to show a  
419 delayed growth in error and subsequent decay in error (figure 5b), suggesting adaptation. It is evident  
420 in figure 5b that although the error in the high- $t_{MF}$  cases with the perturbation was smaller than the  
421 delayed increase in the low- $t_{MF}$  cases with the perturbation, the high- $t_{MF}$  cases showed more sustained  
422 error and no adaptation to the perturbation relative to high- $t_{MF}$  cases without the perturbation. This  
423 result supports Hypothesis-2b.

424

#### 425 4. Discussion

426 We tested two hypotheses about the role of QE training in golf putting. Our first hypothesis was that,  
427 for the dichotomous outcome of putting performance ('make' versus 'miss'), QE training would  
428 improve the odds of a make, clogs (i.e., wooden blocks added to the feet) would reduce the odds of a  
429 make in general and even more for QE trained participants, and multifractal spectrum width of sway,  
430  $W_{MF}$ , would reduce the odds of a make as well. Our second hypothesis was that, for the continuous  
431 outcome of putting performance (radial error), the response of QE-trained participants to a perturbation  
432 of eye height would depend on the multifractality attributable to nonlinear interactions across scales,  
433  $t_{MF}$ . We predicted that lower estimates of  $t_{MF}$  would coincide with a more adaptive response, that is,  
434 with slower growth of radial error and then with subsequent decay of radial error over trials. Results  
435 supported the first hypothesis only partially: we found no main effect of QE training, only a marginally  
436 significant disadvantage due to QE with the clogs, and a significant main effect associating greater  
437 multifractality  $W_{MF}$  with greater error. On the other hand, results strongly supported the second  
438 hypothesis that accuracy with QE depends on the multifractal nonlinearity in postural sway. In fact, the  
439 model testing second hypothesis in the Poisson model replicated the null effects for QE and its  
440 interaction with clogs from the logistic regression. This second model not only replicated the  
441 multifractal effect from the logistic model, but it also elaborated on a strong relationship of QE-trained  
442 performance with multifractal aspects of sway.

443 These results offer two major insights for research into perception-action in visual aiming tasks.  
444 First, it shows that QE training has clear roots in postural sway, vindicating and elaborating earlier  
445 proposals that quiet eye is not simply about stabilizing the eyes [53,54]. Indeed, it has long been known  
446 that simply stabilizing the retinal position compromises the persistence of a visual image [55–57]. And  
447 contrary to a colloquial understanding of 'quiet eye,' more recent work confirms that those small  
448 movements within gaze fixations called 'microsaccades' might prevent fading [58] and support visual  
449 attentional processes [59]. We might draw a comparison between the 'quiet' suggested by 'quiet eye'  
450 and that indicated by 'quiet standing.' Both 'quietudes' provide the needed instruction to a participant  
451 or athlete to 'please move as little as possible,' but below the polite clarity for verbal instruction, both  
452 'quietudes' depend upon a rich texture of fluctuations. Fluctuations throughout the body support  
453 exploration during quiet standing [60], and quiet eye is no less an exception than quiet standing has  
454 been [5–7]. The value of QE is not necessarily a net reduction of fluctuations but rather a way to train  
455 athletes to orient their movements towards the optic flow generated by postural sway. Whereas the  
456 postural-kinematic hypothesis had previously only referred to longer movement duration [22], we now  
457 report that movements are not merely slower but evince a sort of nonlinearity constricting the degrees

458 of freedom across scales of the movement-system hierarchy. In one of the subsections below, we  
459 discuss how this orienting towards optic flow might coordinate with mechanisms invoked by the more  
460 elaborate visual hypothesis (e.g., [61,62]).

461 The second insight is that the multifractality in sway is an essential aspect of postural  
462 adaptations contributing to visually-guided action. It was already known that damping out postural  
463 perturbations could occasion a ratcheting down of multifractality in postural sway [42]. The present  
464 results indicate that this reduction of multifractality is associated with more accurate responses in  
465 visually-guided aiming. Note that this reduced multifractality remains different from corresponding  
466 surrogates. Hence, nonlinear interactions across scales can constrict movement variability, making  
467 reduced multifractality more adaptive [63–65]. This distinction is a departure from any shorthand  
468 presumption that ‘more multifractal is better’ supported by early studies of heart rate variability (HRV)  
469 [66]. Indeed, this departure reflects a growing clarity about the value of multifractal fluctuations for  
470 predicting and explaining outcomes in perception-action.

#### 471 **4.1. Clarifying the value of multifractal fluctuations for perceiving-acting systems**

472 The shorthand ‘more multifractal is better’ presumptions from early studies on HRV [66] have always  
473 underestimated the more elaborate systematicity in the physiology of the human movement system  
474 with upright posture. Early work proposed that a ‘loss of [fractal or multifractal] complexity’ would  
475 occasion or coincide with aging or with pathology [67]. Indeed, early evidence showed that less healthy  
476 outcomes co-occurred with more-than-fractal levels of temporal correlation [68]. However, the task has  
477 always been known to influence multifractality in upright posture: multifractality of quiet standing can  
478 reduce with pathology [69,70], but multifractality in gait can increase with pathology [71], as well as  
479 with walking speeds faster or slower than self-selected comfortable speed [72]. Over the lifespan, the  
480 maturation of gait involves loss of multifractality, beginning with the stabilization of toddler gait into  
481 young adult gait and continuing into older age [73]—this lifelong progression actually is at odds with  
482 more recent evidence that multifractality in HRV remains stable with healthy aging [74].

483 Militating strongly against simple ‘‘more multifractal is better’ kind of presumptions are a  
484 variety of distinctions that are at once obvious but need recognition if we want to identify for what,  
485 after all, multifractality is good. These distinct points include, for instance, that hearts are not upright  
486 bipedal bodies, that age is not itself a pathology, and that walking is not standing. In the promise of  
487 fractal/multifractal analysis, the discourse about ‘complexity,’ ‘dynamical stability,’ and the role of  
488 fractality/multifractality in ‘optimality’ [75–77] can make no claims on all definitions of optimality and  
489 so has not been responsible for acknowledging that some multifractality is not optimal [78]. Indeed,  
490 studies in behavioral sciences have always justified the capacity of fractal variety to offer new insights  
491 [79,80]. Any notion of a privileged level or direction of fractal variety [81] might be best understood as  
492 a reaction to critical perspectives suggesting that the discourse in behavioral sciences should have  
493 much less or perhaps zero fractality or multifractality in [82]. Measurements may wax and wane in  
494 their multifractal structure. The only case in which we think more multifractality is always better than  
495 less is not in all of our measurements but rather in the scientific discourse on the coordination of  
496 movement systems engaged in perception-action.

#### 497 **4.2. The value of multifractal fluctuation is specific to task constraints**

498 What is coming into focus is that the value of nonlinearity-driven multifractality depends on task  
499 context. More of it is adaptive when tasks invite exploration and anticipation. Less of it is adaptive  
500 when the task needs restraint for precise consistency and constraint. As an example of the former,  
501 accumulating information as a reader can require keeping an open mind to follow the discourse  
502 wherever it may lead, and more multifractality  $t_{MF}$  in the pacing of word-by-word reading supports  
503 more fluent reading if the story has a twist in its plot [34]. Similarly, more multifractality  $W_{MF}$  in circle-

504 tracing behaviors make for poor tracing but is associated with better performance on  
505 neurophysiological tests of flexibility with rule switching [83]. The freewheeling benefits of more  
506 multifractality can also compete alongside the precision-, repetition-promoting benefit of less  
507 multifractality. In a Fitts task, greater multifractality  $t_{MF}$  in hand and head movements predicted less  
508 stable contact with the targets, but it became a predictor of more stable contact when participants had  
509 the diffuse warning that they might be asked to close their eyes and continue the task [35]. Hence, what  
510 would have upset task performance became a resource for exploring the task space for the eventuality  
511 of a major loss of sensory information. And now, we see that a less multifractal postural system can be  
512 more stable (e.g., smaller  $t_{MF}$  in [42]; and smaller  $W_{MF}$  in [38,39]) and, as present findings indicate,  
513 more accurate in how it orients behaviors to a visually-guided aiming task.

514 Some of the task-specificity remains unclear, e.g., manual wielding of an object is more  
515 accurate with greater multifractality in postural sway, but hefting an object to perceive heaviness  
516 compared to a reference object is more accurate with less multifractality [33]. This difference could  
517 have to do with the qualities of length and heaviness, but the simpler interpretation could be that  
518 intending to perceive directs attention away from the center of pressure and intending to perceive  
519 heaviness directs attention inwards toward the center of pressure, lending length perceptions and  
520 heaviness perception to more and less postural instability. This issue of directing attention is again a  
521 reason we will need to consider how to link this postural-kinematic work on QE back with the visual-  
522 hypothesis work on QE.

523 The fact that reduced multifractality can be beneficial offers a unique distinction between  
524 possibly two related but distinct interpretations of multifractal results: one as a biomarker of pathology  
525 and the other as adaptation. Indeed, the loss of multifractality can be a biomarker for diagnosing a  
526 pathology [84]. The physiological wisdom informing this usage is that the heart has to be, in effect,  
527 poised to absorb and rebound from perturbations, avoiding fragility due to insult at any single  
528 characteristic scale (e.g., [67]). Implicit in this wisdom is that, within the healthy body, the heart's task  
529 is deeply anticipatory and exploratory, much like those task settings in which whole organisms benefit  
530 from more multifractality. However, hastily concluding that loss of multifractality is just symptomatic  
531 of postural systems with sensory deficits is premature and even casts too gloomy a connotation over  
532 reduced multifractality [70]. The present results with a perturbation of eye height indicate that reduced  
533 multifractality could be an adaptive response preserving stability and promoting task performance in  
534 the face of abrupt change in the organism's mechanical relationship with the base of support. Hence,  
535 far from being the signature of diseased posture, reductions in multifractality that maintain a significant  
536  $t_{MF}$  suggest nonlinear interactions across scales acting context-sensitively to restrain motoric degrees of  
537 freedom so as to achieve the task goal.

538 Different task constraints prompt different modes of movement variability, and if multifractal  
539 depictions of the body seem to physicalize or mechanize the movement system, they do so only in the  
540 way that nonlinear-dynamical physical mechanisms might better explain context-sensitive behavior.  
541 Surely, good-faith pursuit into nonlinear-dynamical complexity should avoid any catch-all  
542 simplification (e.g., 'more is better, less is worse') and keep a keen eye on what sort of multifractality  
543 is good for what end. Nonlinear dynamics has also profited from consideration of its measures in  
544 different reference frames before: experimentally breaking apart the coincidence of relative-phase in  
545 spatial frames from relative-phase in muscular frames revealed novel, more generic structure in the  
546 Haken-Kelso-Bunz [85] law for multi-limb coordination [86]. Finally, considering the task frames for  
547 our interpretation of multifractal estimates may be equally crucial for generalizing predictions for a  
548 multifractal foundation for perception-action. Low multifractality in the heart signals a bad prognosis  
549 to the clinician, but low multifractality in posture supports good task performance in visually-guided  
550 aiming, particularly for an organism beset by malevolent experimenters uprooting their optic flow.

### 551 4.3. The value of multifractality is also specific to different tissues of the body.

552 Just as different tissues of the same body can differently support the same task, we expect that the  
553 multifractal structure that spans across these different tissues supports overarching integrity to the  
554 organismal-level behavior we measure in the laboratory [87]. Here, a comparison of present results  
555 with similar work using a relatively less-mechanical, visual perturbation [36], may tee up  
556 considerations for future work that could elaborate an explanation of QE by integrating the postural-  
557 kinematic hypothesis with the visual hypothesis. The present results resemble those of Carver et al.  
558 [36] who found that, without any training (i.e., neither QE nor technical), more multifractality in torso  
559 sway led to greater error in a low-difficulty Fitts task (compare  $W_{MF}$  in Tables 1 and 3) led to smaller  
560 error in the case of a visual perturbation (compare perturbation  $\times W_{MF}$  in Table 3), that is,  
561 multifractality in head sway became a stabilizing, accuracy-promoting asset to task performance when  
562 the target was far out of reach. Future research could also probe the visual hypothesis for QE for  
563 multifractal foundations, and based on Carver et al.'s [36] results, we predict that QE-trained  
564 performance would improve with greater multifractality in head sway or eye movements. Monofractal  
565 analysis of eye movements has successfully predicted visual attention to text [88], and such  
566 fluctuations in quiet eye likely support an extension of the multifractal support for QE. The present  
567 results do not include gaze data, but we hope it is informative, especially in support of the postural-  
568 kinematic hypothesis, that the QE instructions enlist the nonlinear interactions across scales of the  
569 movement system without drawing the athlete's attention to the body.

570 Ultimately, this task- and anatomically-specific portrait of multifractal fluctuations rests on the  
571 even more generic facts that multifractal fluctuations spread across the body and that estimates of this  
572 spread predict the accuracy of the perceptual outcomes [89,90]. Hence, rather than inventorying body  
573 parts and task constraints prompting different values of multifractality, the longer view of investigating  
574 visually-guided aiming must examine the flow of multifractal fluctuations. Carver et al. [36] found that  
575 multifractality spread from hip to head, as well as from head and hip toward the throwing hand. Indeed,  
576 in all these studies, the body appears to direct multifractal fluctuations towards those body parts most  
577 clearly engaged in the focal tasks. We might expect similar results in golf putting. QE training may  
578 promote this spread by reducing intentional movements of the head and eyes that might interfere with  
579 upstream flows of multifractality. The direction of attention towards a distant target in the visual field  
580 may depend on stabilizing the postural grasp of the surface underfoot and shunting multifractal  
581 fluctuations toward the head and eyes. Indeed, executive functions directing attention to specific  
582 features of the visual field benefits from a rich substrate of multifractal fluctuations in the head [91],  
583 hand [92,93], and brain [94,95] that vary systematically with access to and mastery of the rules  
584 supporting task performance. When we consider that eye movements show multifractality [96] and that  
585 variability in the monofractal structure of eye movements can predict visual attention [88], we see early  
586 glimpses of a multifractal bridge from the postural-kinematic support to the visual support for QE.

587 The novelty of multifractal modeling to behavioral sciences can make this promise of a  
588 multifractal infrastructure supporting visually guided behaviors sound too ethereal and misty to be  
589 practical. But we can root this proposal in the known physiology spanning the very same bones,  
590 muscles, bones, joints, brain, and eyes whose coordination generates the winning golf putt.  
591 Specifically, the connective tissues composing the fascia operate to coordinate context-sensitive  
592 behavior across so wide a variety of scales (e.g. [97]) that multifractality is one of the few current  
593 compelling frameworks for modeling how it might support perception-action [98,99]. Examining how  
594 task constraints moderate a flow of multifractal fluctuations through the body could inform future  
595 explanations for QE training and other visual aiming tasks.

## 596 References

- 597 1. Bernstein NA. 1967 *The Co-ordination and Regulation of Movement*. Oxford, UK: Pergamon  
598 Press.
- 599 2. Latash ML. 2012 The bliss (not the problem) of motor abundance (not redundancy). *Exp. Brain*  
600 *Res.* **217**, 1–5. (doi:10.1007/s00221-012-3000-4)
- 601 3. Latash ML. 2020 On primitives in motor control. *Motor Control* **24**, 318–346.  
602 (doi:10.1123/mc.2019-0099)
- 603 4. Morrison A, McGrath D, Wallace ES. 2016 Motor abundance and control structure in the golf  
604 swing. *Hum. Mov. Sci.* **46**, 129–147. (doi:10.1016/j.humov.2016.01.009)
- 605 5. Stoffregen TA. 1985 Flow structure versus retinal location in the optical control of stance. *J.*  
606 *Exp. Psychol. Hum. Percept. Perform.* **11**, 554–565. (doi:10.1037/0096-1523.11.5.554)
- 607 6. Stoffregen TA. 1986 The role of optical velocity in the control of stance. *Percept. Psychophys.*  
608 **39**, 355–360. (doi:10.3758/BF03203004)
- 609 7. Stoffregen TA, Riccio GE. 1990 Responses to optical looming in the retinal center and  
610 periphery. *Ecol. Psychol.* **2**, 251–274. (doi:10.1207/s15326969eco0203\_3)
- 611 8. Rienhoff R, Tirp J, Strauß B, Baker J, Schorer J. 2016 The ‘quiet eye’ and motor performance:  
612 A systematic review based on Newell’s constraints-led model. *Sport. Med.* **46**, 589–603.  
613 (doi:10.1007/s40279-015-0442-4)
- 614 9. Vickers JN. 1992 Gaze control in putting. *Perception* **21**, 117–132. (doi:10.1068/p210117)
- 615 10. Vickers JN. 1996 Visual control when aiming at a far target. *J. Exp. Psychol. Hum. Percept.*  
616 *Perform.* **22**, 342–354. (doi:10.1037/0096-1523.22.2.342)
- 617 11. Moore LJ, Vine SJ, Cooke A, Ring C, Wilson MR. 2012 Quiet eye training expedites motor  
618 learning and aids performance under heightened anxiety: The roles of response programming  
619 and external attention. *Psychophysiology* **49**, 1005–1015. (doi:10.1111/j.1469-  
620 8986.2012.01379.x)
- 621 12. Vine SJ, Lee DH, Walters-Symons R, Wilson MR. 2017 An occlusion paradigm to assess the  
622 importance of the timing of the quiet eye fixation. *Eur. J. Sport Sci.* **17**, 85–92.  
623 (doi:10.1080/17461391.2015.1073363)
- 624 13. Vine SJ, Lee DON, Moore LEEJ, Wilson MR. 2013 Quiet eye and choking: Online control  
625 breaks down at the point of performance failure. *Med. Sci. Sport. Exerc.* **45**.  
626 (doi:10.1249/MSS.0b013e31829406c7)
- 627 14. Profeta VLS, Turvey MT. 2018 Bernstein’s levels of movement construction: A contemporary  
628 perspective. *Hum. Mov. Sci.* **57**, 111–133. (doi:10.1016/j.humov.2017.11.013)

- 629 15. Kelty-Stephen DG, Lee I-C, Carver NS, Newell KM, Mangalam M. 2020 Visual effort  
630 moderates a self-correcting nonlinear postural control policy. *bioRxiv* , 209502.  
631 (doi:10.1101/2020.07.17.209502)
- 632 16. Mangalam M, Lee I-C, Newell KM, Kelty-Stephen DG. 2020 Visual effort moderates postural  
633 cascade dynamics. *bioRxiv* , 209486. (doi:10.1101/2020.07.17.209486)
- 634 17. Vickers JN. 2011 Mind over muscle: The role of gaze control, spatial cognition, and the quiet  
635 eye in motor expertise. *Cogn. Process.* **12**, 219–222. (doi:10.1007/s10339-011-0411-2)
- 636 18. Panchuk D, Vickers JN. 2006 Gaze behaviors of goaltenders under spatial–temporal constraints.  
637 *Hum. Mov. Sci.* **25**, 733–752. (doi:10.1016/j.humov.2006.07.001)
- 638 19. Shine JM, Aburn MJ, Breakspear M, Poldrack RA. 2018 The modulation of neural gain  
639 facilitates a transition between functional segregation and integration in the brain. *Elife* **7**,  
640 e31130. (doi:10.7554/eLife.31130)
- 641 20. Renshaw I, Davids K, Araújo D, Lucas A, Roberts WM, Newcombe DJ, Franks B. 2019  
642 Evaluating weaknesses of “perceptual-cognitive training” and “brain training” methods in sport:  
643 An ecological dynamics critique. *Front. Psychol.* **9**, 2468.
- 644 21. Davids K, Araújo D. 2016 What could an ecological dynamics rationale offer Quiet Eye  
645 research? Comment on Vickers. *Curr. Issues Sport Sci.* **1**, 104. (doi:10.15203/CISS\_2016.100)
- 646 22. Gallicchio G, Ring C. 2020 The quiet eye effect: A test of the visual and postural-kinematic  
647 hypotheses. *Sport. Exerc. Perform. Psychol.* **9**, 143–159. (doi:10.1037/spy0000162)
- 648 23. Serres JR, Ruffier F. 2017 Optic flow-based collision-free strategies: From insects to robots.  
649 *Arthropod Struct. Dev.* **46**, 703–717. (doi:10.1016/j.asd.2017.06.003)
- 650 24. Stoffregen TA, Yang C-M, Bardy BG. 2005 Affordance judgments and nonlocomotor body  
651 movement. *Ecol. Psychol.* **17**, 75–104. (doi:10.1207/s15326969eco1702\_2)
- 652 25. de Oliveira RF. 2016 Visual perception in expert action. In *Performance Psychology:  
653 Perception, Aaction, Cognition, Emotion* (eds M Raab, B Lobinger, S Hoffman, A Pizzera, S  
654 Laborde), pp. 254–270. London, UK: Academic Press.
- 655 26. Frenz H, Bremmer F, Lappe M. 2003 Discrimination of travel distances from ‘situated’ optic  
656 flow. *Vision Res.* **43**, 2173–2183. (doi:10.1016/S0042-6989(03)00337-7)
- 657 27. Mark LS. 1987 Eyeheight-scaled information about affordances: A study of sitting and stair  
658 climbing. *J. Exp. Psychol. Hum. Percept. Perform.* **13**, 361–370. (doi:10.1037/0096-  
659 1523.13.3.361)
- 660 28. Mark LS, Balliett JA, Craver KD, Douglas SD, Fox T. 1990 What an actor must do in order to  
661 perceive the affordance for sitting. *Ecol. Psychol.* **2**, 325–366.  
662 (doi:10.1207/s15326969eco0204\_2)



- 663 29. Ihlen EAF, Vereijken B. 2010 Interaction-dominant dynamics in human cognition: Beyond  $1/f$   
664 fluctuation. *J. Exp. Psychol. Gen.* **139**, 436–463. (doi:10.1037/a0019098)
- 665 30. Doyon JK, Hajnal A, Surber T, Clark JD, Kelty-Stephen DG. 2019 Multifractality of posture  
666 modulates multisensory perception of stand-on-ability. *PLoS One* **14**, e0212220.  
667 (doi:10.1371/journal.pone.0212220)
- 668 31. Hajnal A, Clark JD, Doyon JK, Kelty-Stephen DG. 2018 Fractality of body movements predicts  
669 perception of affordances: Evidence from stand-on-ability judgments about slopes. *J. Exp.*  
670 *Psychol. Hum. Percept. Perform.* **44**, 836–841. (doi:10.1037/xhp0000510)
- 671 32. Teng DW, Eddy CL, Kelty-Stephen DG. 2016 Non-visually-guided distance perception depends  
672 on matching torso fluctuations between training and test. *Attention, Perception, Psychophys.* **78**,  
673 2320–2328. (doi:10.3758/s13414-016-1213-5)
- 674 33. Mangalam M, Kelty-Stephen DG. 2020 Multiplicative-cascade dynamics supports whole-body  
675 coordination for perception via effortful touch. *Hum. Mov. Sci.* **70**, 102595.  
676 (doi:10.1016/j.humov.2020.102595)
- 677 34. Booth CR, Brown HL, Eason EG, Wallot S, Kelty-Stephen DG. 2018 Expectations on  
678 hierarchical scales of discourse: Multifractality predicts both short- and long-range effects of  
679 violating gender expectations in text reading. *Discourse Process.* **55**, 12–30.  
680 (doi:10.1080/0163853X.2016.1197811)
- 681 35. Bell C, Carver N, Zbaracki J, Kelty-Stephen D. 2019 Nonlinear amplification of variability  
682 through interaction across scales supports greater accuracy in manual aiming: Evidence from a  
683 multifractal analysis with comparisons to linear surrogates in the Fitts task. *Front. Physiol.* **10**,  
684 998. (doi:10.3389/fphys.2019.00998)
- 685 36. Carver NS, Bojovic D, Kelty-Stephen DG. 2017 Multifractal foundations of visually-guided  
686 aiming and adaptation to prismatic perturbation. *Hum. Mov. Sci.* **55**, 61–72.  
687 (doi:10.1016/j.humov.2017.07.005)
- 688 37. Munafo J, Curry C, Wade MG, Stoffregen TA. 2016 The distance of visual targets affects the  
689 spatial magnitude and multifractal scaling of standing body sway in younger and older adults.  
690 *Exp. Brain Res.* **234**, 2721–2730. (doi:10.1007/s00221-016-4676-7)
- 691 38. Koslucher F, Munafo J, Stoffregen TA. 2016 Postural sway in men and women during  
692 nauseogenic motion of the illuminated environment. *Exp. Brain Res.* **234**, 2709–2720.  
693 (doi:10.1007/s00221-016-4675-8)
- 694 39. Li R, Walter HJ, Stoffregen TA. 2020 The role of visual feedback about motion of the ground on  
695 postural sway. *J. Mot. Behav.* **52**, 352–359. (doi:10.1080/00222895.2019.1627281)
- 696 40. Chen L-C, Metcalfe JS, Chang T-Y, Jeka JJ, Clark JE. 2008 The development of infant upright  
697 posture: Sway less or sway differently? *Exp. Brain Res.* **186**, 293–303. (doi:10.1007/s00221-  
698 007-1236-1)

- 699 41. Rajachandrakumar R, Mann J, Schinkel-Ivy A, Mansfield A. 2018 Exploring the relationship  
700 between stability and variability of the centre of mass and centre of pressure. *Gait Posture* **63**,  
701 254–259. (doi:10.1016/j.gaitpost.2018.05.008)
- 702 42. Kelty-Stephen DG. 2018 Multifractal evidence of nonlinear interactions stabilizing posture for  
703 phasmids in windy conditions: A reanalysis of insect postural-sway data. *PLoS One* **13**,  
704 e0202367. (doi:10.1371/journal.pone.0202367)
- 705 43. Lee JT, Kelty-Stephen DG. 2017 Cascade-driven series with narrower multifractal spectra than  
706 their surrogates: Standard deviation of multipliers changes interactions across scales. *Complexity*  
707 **2017**, 7015243. (doi:10.1155/2017/7015243)
- 708 44. van Smeden M, de Groot JAH, Moons KGM, Collins GS, Altman DG, Eijkemans MJC, Reitsma  
709 JB. 2016 No rationale for 1 variable per 10 events criterion for binary logistic regression  
710 analysis. *BMC Med. Res. Methodol.* **16**, 163. (doi:10.1186/s12874-016-0267-3)
- 711 45. Oldfield RC. 1971 The assessment and analysis of handedness: The Edinburgh inventory.  
712 *Neuropsychologia* **9**, 97–113. (doi:10.1016/0028-3932(71)90067-4)
- 713 46. Vine S, Moore L, Wilson M. 2011 Quiet eye training facilitates competitive putting performance  
714 in elite golfers. *Front. Psychol.* **2**, 8. (doi:0.3389/fpsyg.2011.00008)
- 715 47. Cooke A, Kavussanu M, McIntyre D, Ring C. 2010 Psychological, muscular and kinematic  
716 factors mediate performance under pressure. *Psychophysiology* **47**, 1109–1118.  
717 (doi:10.1111/j.1469-8986.2010.01021.x)
- 718 48. Chhabra A, Jensen R V. 1989 Direct determination of the  $f(\alpha)$  singularity spectrum. *Phys. Rev.*  
719 *Lett.* **62**, 1327–1330. (doi:10.1103/PhysRevLett.62.1327)
- 720 49. Shannon CE. 1948 A mathematical theory of communication. *Bell Syst. Tech. J.* **27**, 379–423.  
721 (doi:10.1002/j.1538-7305.1948.tb01338.x)
- 722 50. Schreiber T, Schmitz A. 1996 Improved surrogate data for nonlinearity tests. *Phys. Rev. Lett.* **77**,  
723 635–638. (doi:10.1103/PhysRevLett.77.635)
- 724 51. Bates D, Sarkar D, Bates M, Matrix L. 2007 The lme4 package.
- 725 52. Allison PD. 1977 Testing for interaction in multiple regression. *Am. J. Sociol.* **83**, 144–153.  
726 (doi:10.1086/226510)
- 727 53. Liphart J, Gallichio J, Tilson JK, Pei Q, Wu SS, Duncan PW. 2015 Concordance and  
728 discordance between measured and perceived balance and the effect on gait speed and falls  
729 following stroke. *Clin. Rehabil.* **30**, 294–302. (doi:10.1177/0269215515578294)
- 730 54. Williams AM. 2016 Quiet eye vs. noisy brain: The eye like the brain is always active—comment  
731 on Vickers. *Curr. Issues Sport Sci.* **1**, 116. (doi:10.15203/CISS\_2016.116)

- 732 55. Barlow HB. 1963 Slippage of contact lenses and other artefacts in relation to fading and  
733 regeneration of supposedly stable retinal images. *Q. J. Exp. Psychol.* **15**, 36–51.  
734 (doi:10.1080/17470216308416550)
- 735 56. Coppola D, Purves D. 1996 The extraordinarily rapid disappearance of entopic images. *Proc.*  
736 *Natl. Acad. Sci.* **93**, 8001–8004. (doi:10.1073/pnas.93.15.8001)
- 737 57. Ditchburn RW, Ginsborg BL. 1952 Vision with a stabilized retinal image. *Nature* **170**, 36–37.  
738 (doi:10.1038/170036a0)
- 739 58. Martinez-Conde S, Macknik SL, Troncoso XG, Dyar TA. 2006 Microsaccades counteract visual  
740 fading during fixation. *Neuron* **49**, 297–305. (doi:10.1016/j.neuron.2005.11.033)
- 741 59. Krueger E, Schneider A, Chavallaz A, Groner R, Sawyer BD, Sonderegger A, Hancock PA.  
742 2019 Microsaccades distinguish looking from seeing. *J. Eye Mov. Res.* **12**, 2.
- 743 60. Murnaghan CD, Carpenter MG, Chua R, Inglis JT. 2016 Keeping still doesn't "make sense":  
744 Examining a role for movement variability by stabilizing the arm during a postural control task.  
745 *J. Neurophysiol.* **117**, 846–852. (doi:10.1152/jn.01150.2015)
- 746 61. Gallicchio G, Cooke A, Ring C. 2017 Practice makes efficient: Cortical alpha oscillations are  
747 associated with improved golf putting performance. *Sport. Exerc. Perform. Psychol.* **6**, 89–102.  
748 (doi:10.1037/spy0000077)
- 749 62. Gallicchio G, Cooke A, Ring C. 2016 Lower left temporal-frontal connectivity characterizes  
750 expert and accurate performance: High-alpha T7-Fz connectivity as a marker of conscious  
751 processing during movement. *Sport. Exerc. Perform. Psychol.* **5**, 14–24.  
752 (doi:10.1037/spy0000055)
- 753 63. Vaz DV, Silva PL, Mancini MC, Carello C, Kinsella-Shaw J. 2017 Towards an ecologically  
754 grounded functional practice in rehabilitation. *Hum. Mov. Sci.* **52**, 117–132.  
755 (doi:10.1016/j.humov.2017.01.010)
- 756 64. Holt KG, Wagenaar RO, Saltzman E. 2010 A dynamic systems: Constraints approach to  
757 rehabilitation. *Brazilian J. Phys. Ther.* **14**, 446–463. (doi:10.1590/S1413-35552010000600002)
- 758 65. Harrison SJ, Stergiou N. 2015 Complex adaptive behavior and dexterous action. *Nonlinear*  
759 *Dynamics. Psychol. Life Sci.* **19**, 345–394.
- 760 66. Ivanov PC, Nunes Amaral LA, Goldberger AL, Havlin S, Rosenblum MG, Stanley HE, Struzik  
761 ZR. 2001 From 1/f noise to multifractal cascades in heartbeat dynamics. *Chaos An Interdiscip.*  
762 *J. Nonlinear Sci.* **11**, 641–652. (doi:10.1063/1.1395631)
- 763 67. Lipsitz LA, Goldberger AL. 1992 Loss of 'complexity' and aging: Potential applications of  
764 fractals and chaos theory to senescence. *JAMA* **267**, 1806–1809.  
765 (doi:10.1001/jama.1992.03480130122036)

- 766 68. Lipsitz LA. 2002 Dynamics of stability: The physiologic basis of functional health and frailty.  
767 *Journals Gerontol. Ser. A* **57**, B115–B125. (doi:10.1093/gerona/57.3.B115)
- 768 69. Morales CJ, Kolaczyk ED. 2002 Wavelet-based multifractal analysis of human balance. *Ann.*  
769 *Biomed. Eng.* **30**, 588–597. (doi:10.1114/1.1478082)
- 770 70. Shimizu YU, Thurner S, Ehrenberger K. 2002 Multifractal spectra as a measure of complexity in  
771 human posture. *Fractals* **10**, 103–116. (doi:10.1142/S0218348X02001130)
- 772 71. Muñoz-Diosdado A. 2005 A non linear analysis of human gait time series based on multifractal  
773 analysis and cross correlations. *J. Phys. Conf. Ser.* **23**, 87–95. (doi:10.1088/1742-6596/23/1/010)
- 774 72. West BJ, Scafetta N. 2003 Nonlinear dynamical model of human gait. *Phys. Rev. E* **67**, 51917.  
775 (doi:10.1103/PhysRevE.67.051917)
- 776 73. Ashkenazy Y, M. Hausdorff J, Ch. Ivanov P, Eugene Stanley H. 2002 A stochastic model of  
777 human gait dynamics. *Phys. A Stat. Mech. its Appl.* **316**, 662–670. (doi:10.1016/S0378-  
778 4371(02)01453-X)
- 779 74. Schmitt DT, Ivanov PC. 2007 Fractal scale-invariant and nonlinear properties of cardiac  
780 dynamics remain stable with advanced age: A new mechanistic picture of cardiac control in  
781 healthy elderly. *Am. J. Physiol. Integr. Comp. Physiol.* **293**, R1923–R1937.  
782 (doi:10.1152/ajpregu.00372.2007)
- 783 75. Friston K, Breakspear M, Deco G. 2012 Perception and self-organized instability. *Front.*  
784 *Comput. Neurosci.* **6**, 44. (doi:10.3389/fncom.2012.00044)
- 785 76. Oftadeh R, Haghpanah B, Vella D, Boudaoud A, Vaziri A. 2014 Optimal fractal-like  
786 hierarchical honeycombs. *Phys. Rev. Lett.* **113**, 104301. (doi:10.1103/PhysRevLett.113.104301)
- 787 77. Schlesinger MF, Klafter J. 1986 Lévy walks versus Lévy flights. In *Growth and Form* (eds HE  
788 Stanley, N Ostrowski), pp. 279–283. Amsterdam, Netherlands: Martinus Nijhoff.
- 789 78. Reynolds AM. 2015 Liberating Lévy walk research from the shackles of optimal foraging. *Phys.*  
790 *Life Rev.* **14**, 59–83. (doi:10.1016/j.pprev.2015.03.002)
- 791 79. Dixon JA, Holden JG, Mirman D, Stephen DG. 2012 Multifractal dynamics in the emergence of  
792 cognitive structure. *Top. Cogn. Sci.* **4**, 51–62. (doi:10.1111/j.1756-8765.2011.01162.x)
- 793 80. Diniz A *et al.* 2011 Contemporary theories of  $1/f$  noise in motor control. *Hum. Mov. Sci.* **30**,  
794 889–905. (doi:10.1016/j.humov.2010.07.006)
- 795 81. Kello CT. 2018 Editor’s introduction and review: Coordination and context in cognitive science.  
796 *Top. Cogn. Sci.* **10**, 6–17. (doi:10.1111/tops.12302)
- 797 82. Wagenmakers E-J, van der Maas HLJ, Farrell S. 2012 Abstract concepts require concrete  
798 models: Why cognitive scientists have not yet embraced nonlinearly coupled, dynamical, self-  
799 organized critical, synergistic, scale-free, exquisitely context-sensitive, interaction-dominant,

- 800 multifractal, interdependent b. *Top. Cogn. Sci.* **4**, 87–93. (doi:10.1111/j.1756-  
801 8765.2011.01164.x)
- 802 83. Kelty-Stephen DG, Stirling LA, Lipsitz LA. 2016 Multifractal temporal correlations in circle-  
803 tracing behaviors are associated with the executive function of rule-switching assessed by the  
804 Trail Making Test. *Psychol. Assess.* **28**, 171–180. (doi:10.1037/pas0000177)
- 805 84. Meyer M, Stiedl O, Kerman B. 2003 Discrimination by multifractal spectrum estimation of  
806 human heartbeat interval dynamics. *Fractals* **11**, 195–204. (doi:10.1142/S0218348X03002063)
- 807 85. Haken H, Kelso JAS, Bunz H. 1985 A theoretical model of phase transitions in human hand  
808 movements. *Biol. Cybern.* **51**, 347–356. (doi:10.1007/BF00336922)
- 809 86. Park H, Turvey MT. 2008 Imperfect symmetry and the elementary coordination law. In  
810 *Coordination: Neural, Behavioral and Social Dynamics* (eds A Fuchs, VK Jirsa), pp. 3–25.  
811 Berlin, Heidelberg: Springer Berlin Heidelberg. (doi:10.1007/978-3-540-74479-5\_1)
- 812 87. Stoffregen TA, Mantel B, Bardy BG. 2017 The senses considered as one perceptual system.  
813 *Ecol. Psychol.* **29**, 165–197. (doi:10.1080/10407413.2017.1331116)
- 814 88. Wallot S, O’Brien B, Coey CA, Kelty-Stephen D. 2015 Power-law fluctuations in eye  
815 movements predict text comprehension during connected text reading. In *Proceedings of the*  
816 *37th Annual Meeting of the Cognitive Science Society* (eds DC Noelle, R Dale, AS Warlaumont,  
817 J Yoshimi, T Matlock, CD Jennings), pp. 2583–2588.
- 818 89. Mangalam M, Carver NS, Kelty-Stephen DG. 2020 Global broadcasting of local fractal  
819 fluctuations in a bodywide distributed system supports perception via effortful touch. *Chaos,*  
820 *Solitons & Fractals* **135**, 109740. (doi:10.1016/j.chaos.2020.109740)
- 821 90. Mangalam M, Carver NS, Kelty-Stephen DG. 2020 Multifractal signatures of perceptual  
822 processing on anatomical sleeves of the human body. *J. R. Soc. Interface* **17**, 20200328.  
823 (doi:10.1098/rsif.2020.0328)
- 824 91. Kelty-Stephen DG, Dixon JA. 2014 Interwoven fluctuations during intermodal perception:  
825 Fractality in head sway supports the use of visual feedback in haptic perceptual judgments by  
826 manual wielding. *J. Exp. Psychol. Hum. Percept. Perform.* **40**, 2289–2309.  
827 (doi:10.1037/a0038159)
- 828 92. Stephen D, Anastas J, Dixon J. 2012 Scaling in cognitive performance reflects multiplicative  
829 multifractal cascade dynamics. *Front. Physiol.* **3**, 102. (doi:10.3389/fphys.2012.00102)
- 830 93. Anastas JR, Kelty-Stephen DG, Dixon JA. 2014 Executive function as an interaction-dominant  
831 process. *Ecol. Psychol.* **26**, 262–282. (doi:10.1080/10407413.2014.957985)
- 832 94. Kardan O, Adam KCS, Mance I, Churchill NW, Vogel EK, Berman MG. 2020 Distinguishing  
833 cognitive effort and working memory load using scale-invariance and alpha suppression in EEG.  
834 *Neuroimage* **211**, 116622. (doi:10.1016/j.neuroimage.2020.116622)

- 835 95. Kardan O, Layden E, Choe KW, Lyu M, Zhang X, Beilock SL, Rosenberg MD, Berman MG.  
836 2020 Scale-invariance in brain activity predicts practice effects in cognitive performance.  
837 *bioRxiv*, 114959. (doi:10.1101/2020.05.25.114959)
- 838 96. Kelty-Stephen DG, Mirman D. 2013 Gaze fluctuations are not additively decomposable: Reply  
839 to Bogartz and Staub. *Cognition* **126**, 128–134. (doi:10.1016/j.cognition.2012.09.002)
- 840 97. Ingber DE. 2006 Cellular mechanotransduction: Putting all the pieces together again. *FASEB J.*  
841 **20**, 811–827. (doi:10.1096/fj.05-5424rev)
- 842 98. Turvey MT, Fonseca ST. 2014 The medium of haptic perception: A tensegrity hypothesis. *J.*  
843 *Mot. Behav.* **46**, 143–187. (doi:10.1080/00222895.2013.798252)
- 844 99. Schleip R, Mechsner F, Zorn A, Klingler W. 2014 The bodywide fascial network as a sensory  
845 organ for haptic perception. *J. Mot. Behav.* **46**, 191–193. (doi:10.1080/00222895.2014.880306)
- 846 100. Moore LJ, Vine SJ, Freeman P, Wilson MR. 2013 Quiet eye training promotes challenge  
847 appraisals and aids performance under elevated anxiety. *Int. J. Sport Exerc. Psychol.* **11**, 169–  
848 183. (doi:10.1080/1612197X.2013.773688)

849 **Table 1.** Training instructions given to the quiet-eye and technical groups during the training phase.

| <b>quiet-eye (QE) training instructions</b>                                                                                                              | <b>technical training instructions</b>                                                       |
|----------------------------------------------------------------------------------------------------------------------------------------------------------|----------------------------------------------------------------------------------------------|
| assume your stance, and ensure your gaze is located on the back of the ball                                                                              | take your stance with your legs shoulder-width apart                                         |
| after setting up over the ball, fix your gaze on the hole                                                                                                | set your position so that your head is directly above the ball looking down                  |
| make no more than three fixations towards the hole                                                                                                       | keep your clubhead square to the ball                                                        |
| your final fixation should be a quiet eye on the back of the ball. The onset of the quiet eye should occur before the stroke begins and last for 2 to 3s | allow your arms and shoulders to remain loose                                                |
| ensure you direct gaze towards the clubhead during the putting stroke                                                                                    | the putting action should be pendulum-like, making sure that you accelerate through the ball |
| the quiet eye should remain on the green for 200 to 300ms after the club contacts the ball                                                               | after contact, follow through but keep your head still and facing down                       |

850 Source: Adapted from [100].

851 **Table 2.** Logistic regression modeling of successful shots.

| <b>predictor</b>  | <b><i>b</i></b> | <b><i>s.e.m.</i></b> | <b><i>p</i><sup>*</sup></b> |
|-------------------|-----------------|----------------------|-----------------------------|
| intercept         | -2.85           | 0.48                 | < <b>0.0001</b>             |
| QE                | 0.20            | 0.30                 | 0.51                        |
| perturbation      | -0.22           | 0.43                 | 0.60                        |
| QE × perturbation | -1.16           | 0.65                 | 0.07                        |
| block             | 0.24            | 0.13                 | <b>0.06</b>                 |
| $RMS_{Acc}$       | 4.05            | 1.34                 | < <b>0.01</b>               |
| $W_{MF}$          | -7.25           | 2.94                 | < <b>0.05</b>               |

852 \*boldfaced values indicate statistical significance at the alpha level of 0.05.



853 **Table 3.** Subset of Poisson regression model including main and interaction effects non-multifractal  
 854 and multifractal measures of sway, perturbation of eye height, and time

| <b>predictor</b>                                                                                   | <b><i>b</i></b>        | <b><i>s.e.m.</i></b>  | <b><i>p</i><sup>*</sup></b> |
|----------------------------------------------------------------------------------------------------|------------------------|-----------------------|-----------------------------|
| <i>effects of non-multifractal measures of sway</i><br>(see Section 3.2.1.)                        |                        |                       |                             |
| <i>MSD</i> <sub>acc</sub>                                                                          | -8.80×10 <sup>0</sup>  | 1.67×10 <sup>-1</sup> | < <b>0.0001</b>             |
| <i>Mean</i> <sub>disp</sub>                                                                        | -2.91×10 <sup>2</sup>  | 1.33×10 <sup>1</sup>  | < <b>0.0001</b>             |
| <i>SD</i> <sub>disp</sub>                                                                          | 4.43×10 <sup>0</sup>   | 1.64×10 <sup>0</sup>  | < <b>0.01</b>               |
| <i>MSD</i> <sub>acc</sub> × <i>Mean</i> <sub>disp</sub>                                            | 1.97×10 <sup>4</sup>   | 1.00×10 <sup>1</sup>  | < <b>0.0001</b>             |
| <i>MSD</i> <sub>acc</sub> × <i>SD</i> <sub>disp</sub>                                              | -3.11×10 <sup>3</sup>  | 1.03×10 <sup>1</sup>  | < <b>0.0001</b>             |
| <i>Mean</i> <sub>disp</sub> × <i>SD</i> <sub>disp</sub>                                            | 2.56×10 <sup>4</sup>   | 1.05×10 <sup>1</sup>  | < <b>0.0001</b>             |
| <i>MSD</i> <sub>acc</sub> × <i>Mean</i> <sub>disp</sub> × <i>SD</i> <sub>disp</sub>                | -1.04×10 <sup>5</sup>  | 1.08×10 <sup>1</sup>  | < <b>0.0001</b>             |
| <i>effects of multifractal measures of sway and interactions with time</i><br>(see Section 3.2.2.) |                        |                       |                             |
| <i>W</i> <sub>MF</sub>                                                                             | 1.80×10 <sup>0</sup>   | 1.29×10 <sup>-1</sup> | < <b>0.0001</b>             |
| <i>t</i> <sub>MF</sub>                                                                             | 2.21×10 <sup>-4</sup>  | 1.05×10 <sup>-3</sup> | 0.83                        |
| <i>W</i> <sub>MF</sub> × <i>t</i> <sub>MF</sub>                                                    | -5.93×10 <sup>-3</sup> | 8.27×10 <sup>-3</sup> | 0.48                        |
| <i>t</i> <sub>MF</sub> × trial <sub>block</sub> (Linear)                                           | 1.36×10 <sup>-2</sup>  | 9.82×10 <sup>-3</sup> | 0.17                        |
| <i>t</i> <sub>MF</sub> × trial <sub>block</sub> (Quadratic)                                        | -8.93×10 <sup>-2</sup> | 1.15×10 <sup>-2</sup> | < <b>0.0001</b>             |
| <i>t</i> <sub>MF</sub> × trial <sub>block</sub> (Cubic)                                            | -1.08×10 <sup>-2</sup> | 1.14×10 <sup>-2</sup> | 0.34                        |
| <i>interactions of multifractal measures of sway with perturbation</i><br>(see Section 3.2.3.)     |                        |                       |                             |
| QE × <i>W</i> <sub>MF</sub>                                                                        | -1.04×10 <sup>-0</sup> | 2.03×10 <sup>-1</sup> | < <b>0.0001</b>             |
| QE × <i>t</i> <sub>MF</sub>                                                                        | -1.85×10 <sup>-3</sup> | 1.30×10 <sup>-3</sup> | 0.16                        |
| QE × <i>W</i> <sub>MF</sub> × <i>t</i> <sub>MF</sub>                                               | -4.59×10 <sup>-3</sup> | 1.09×10 <sup>-2</sup> | 0.67                        |
| perturbation × <i>W</i> <sub>MF</sub>                                                              | -1.50×10 <sup>0</sup>  | 3.12×10 <sup>-1</sup> | < <b>0.0001</b>             |
| perturbation × <i>t</i> <sub>MF</sub>                                                              | 4.57×10 <sup>-3</sup>  | 2.85×10 <sup>-3</sup> | 0.11                        |
| perturbation × <i>W</i> <sub>MF</sub> × <i>t</i> <sub>MF</sub>                                     | 1.54×10 <sup>-1</sup>  | 3.15×10 <sup>-2</sup> | < <b>0.0001</b>             |
| QE × perturbation × <i>W</i> <sub>MF</sub>                                                         | 2.12×10 <sup>0</sup>   | 4.91×10 <sup>-1</sup> | < <b>0.0001</b>             |
| QE × perturbation × <i>t</i> <sub>MF</sub>                                                         | 8.62×10 <sup>-3</sup>  | 4.18×10 <sup>-3</sup> | < <b>0.05</b>               |
| QE × perturbation × <i>W</i> <sub>MF</sub> × <i>t</i> <sub>MF</sub>                                | -2.21×10 <sup>-1</sup> | 4.97×10 <sup>-2</sup> | < <b>0.0001</b>             |
| <i>interactions of multifractal measures with perturbation and time</i><br>(see Section 3.2.4.)    |                        |                       |                             |
| QE × trial <sub>block</sub> (Linear) × <i>t</i> <sub>MF</sub>                                      | -3.73×10 <sup>-2</sup> | 1.46×10 <sup>-2</sup> | < <b>0.05</b>               |
| QE × trial <sub>block</sub> (Quadratic) × <i>t</i> <sub>MF</sub>                                   | -1.85×10 <sup>-1</sup> | 1.66×10 <sup>-2</sup> | < <b>0.0001</b>             |
| QE × trial <sub>block</sub> (Cubic) × <i>t</i> <sub>MF</sub>                                       | 1.13×10 <sup>-1</sup>  | 1.73×10 <sup>-2</sup> | < <b>0.0001</b>             |
| perturbation × trial <sub>block</sub> (Linear) × <i>t</i> <sub>MF</sub>                            | 3.83×10 <sup>-1</sup>  | 5.28×10 <sup>-2</sup> | < <b>0.0001</b>             |
| perturbation × trial <sub>block</sub> (Quadratic) × <i>t</i> <sub>MF</sub>                         | 4.07×10 <sup>-1</sup>  | 5.20×10 <sup>-2</sup> | < <b>0.0001</b>             |
| perturbation × trial <sub>block</sub> (Cubic) × <i>t</i> <sub>MF</sub>                             | 5.39×10 <sup>-1</sup>  | 4.45×10 <sup>-2</sup> | < <b>0.0001</b>             |
| QE × perturbation × trial <sub>block</sub> (Linear) × <i>t</i> <sub>MF</sub>                       | -2.71×10 <sup>-1</sup> | 6.11×10 <sup>-2</sup> | < <b>0.0001</b>             |
| QE × perturbation × trial <sub>block</sub> (Quadratic) × <i>t</i> <sub>MF</sub>                    | 5.24×10 <sup>-1</sup>  | 6.14×10 <sup>-2</sup> | < <b>0.0001</b>             |
| QE × perturbation × trial <sub>block</sub> (Cubic) × <i>t</i> <sub>MF</sub>                        | -7.90×10 <sup>-1</sup> | 5.79×10 <sup>-2</sup> | < <b>0.0001</b>             |

855 \*boldfaced values indicate statistical significance at the alpha level of 0.05.

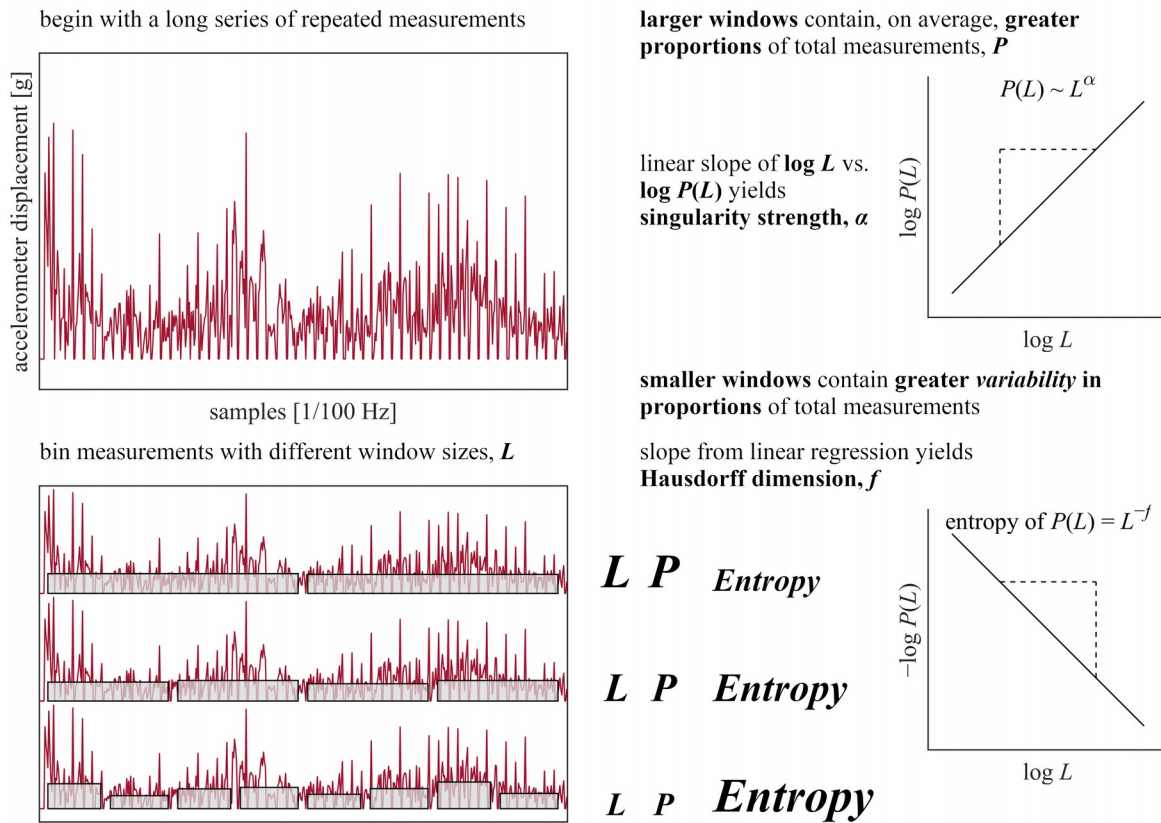

856 **Figure 1.** Schematic of Chhabra and Jensen's [48] method used to estimate multifractal spectrum  
 857  $f(\alpha)$  (Part-1). See Section 2.4.1. for further details.

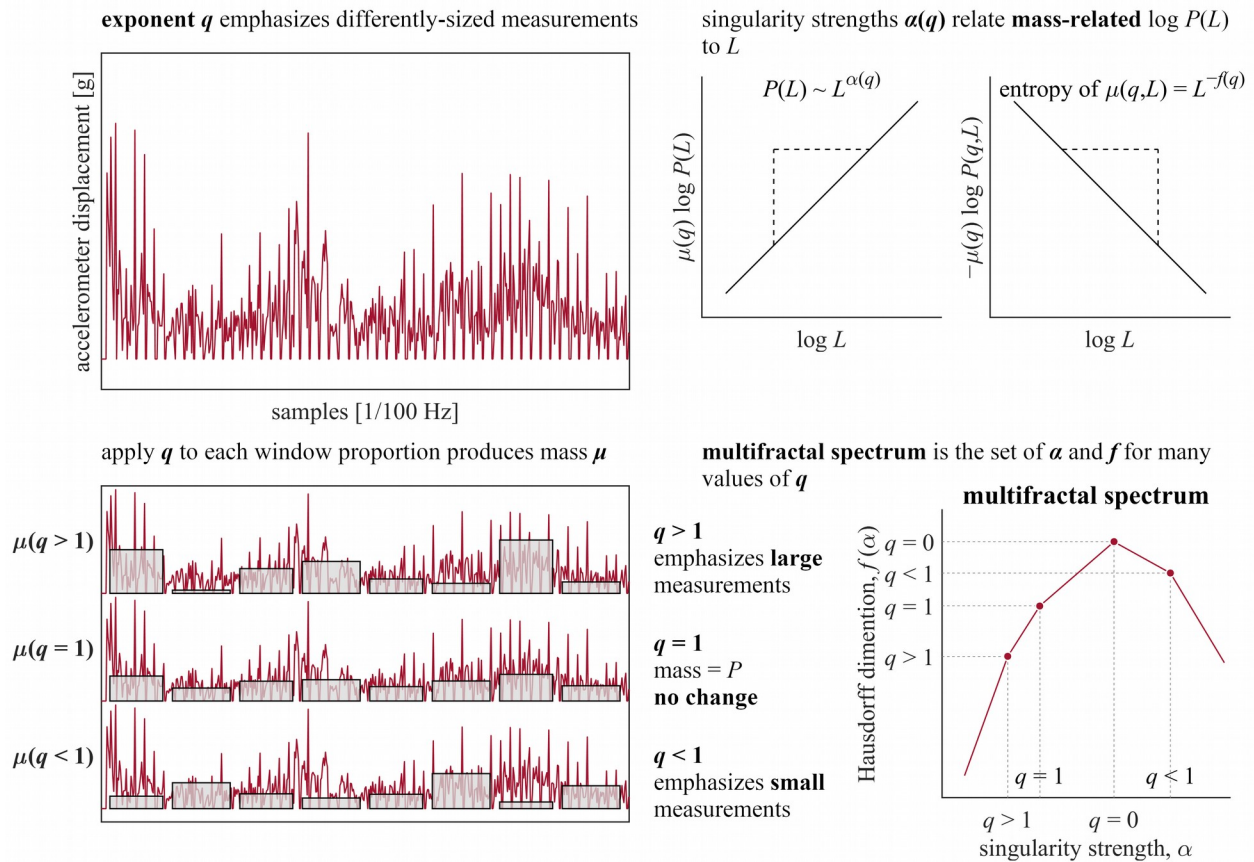

858 **Figure 2.** Schematic of Chhabra and Jensen's [48] method used to estimate multifractal spectrum  
 859  $f(\alpha)$  (Part-2). See Section 2.4.1. for further details.

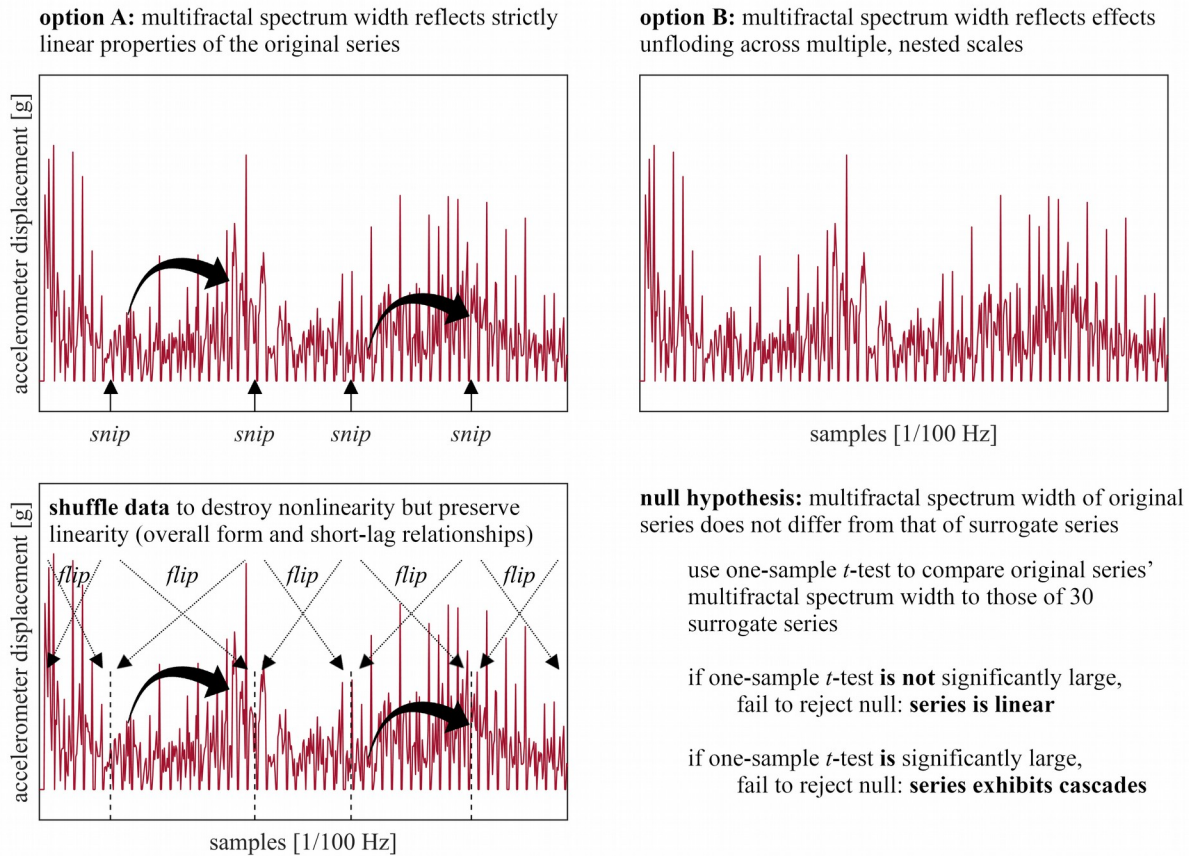

860 **Figure 3.** Surrogate analysis used to identify whether a series exhibits multifractality due to  
861 nonlinearity (cascades). See Section 2.4.2. for further details.

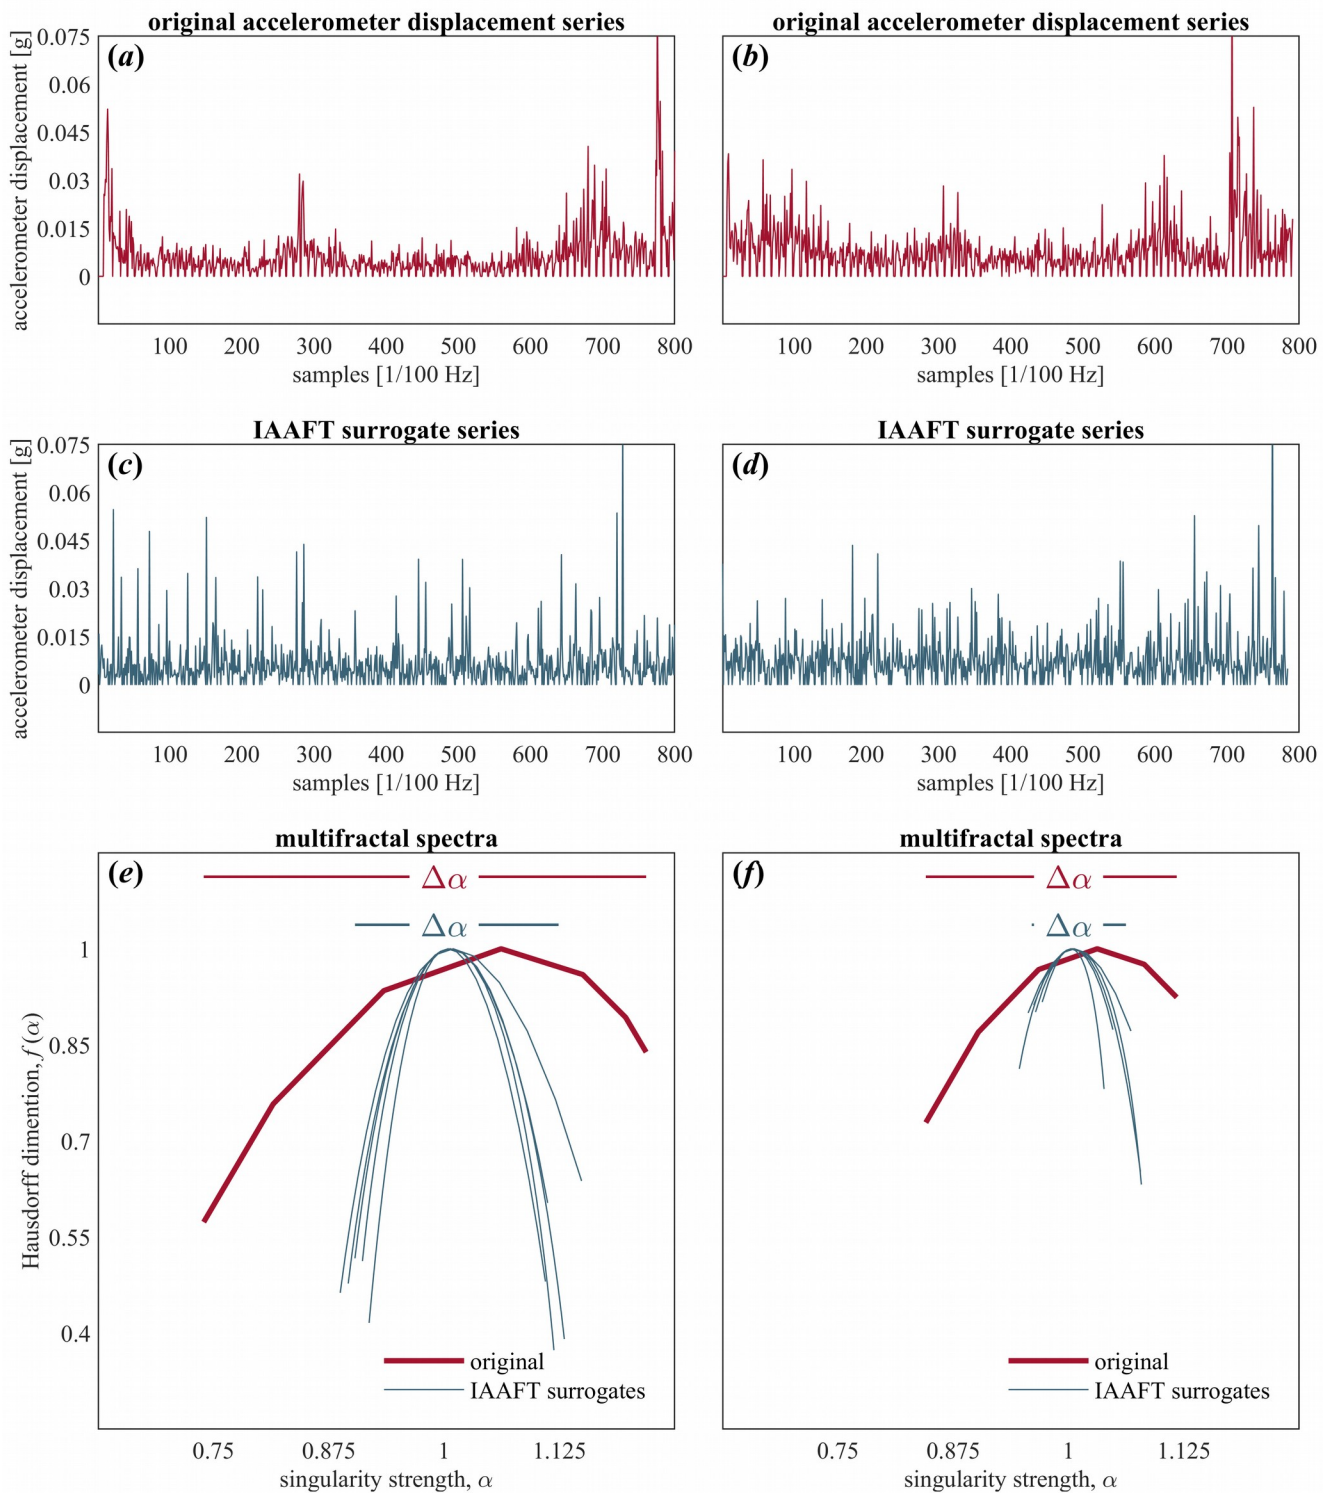

862 **Figure 4.** Multifractal analysis. (a, b) Representative original accelerometer displacement series. (c, d)  
863 Representative IAAFT surrogate series of the original accelerometer displacement series in a and b. (e,  
864 f) Multifractal spectrum ( $f(\alpha)$ ,  $\alpha$ ) of original series in a and b, and those of their five representative  
865 IAAFT surrogates.

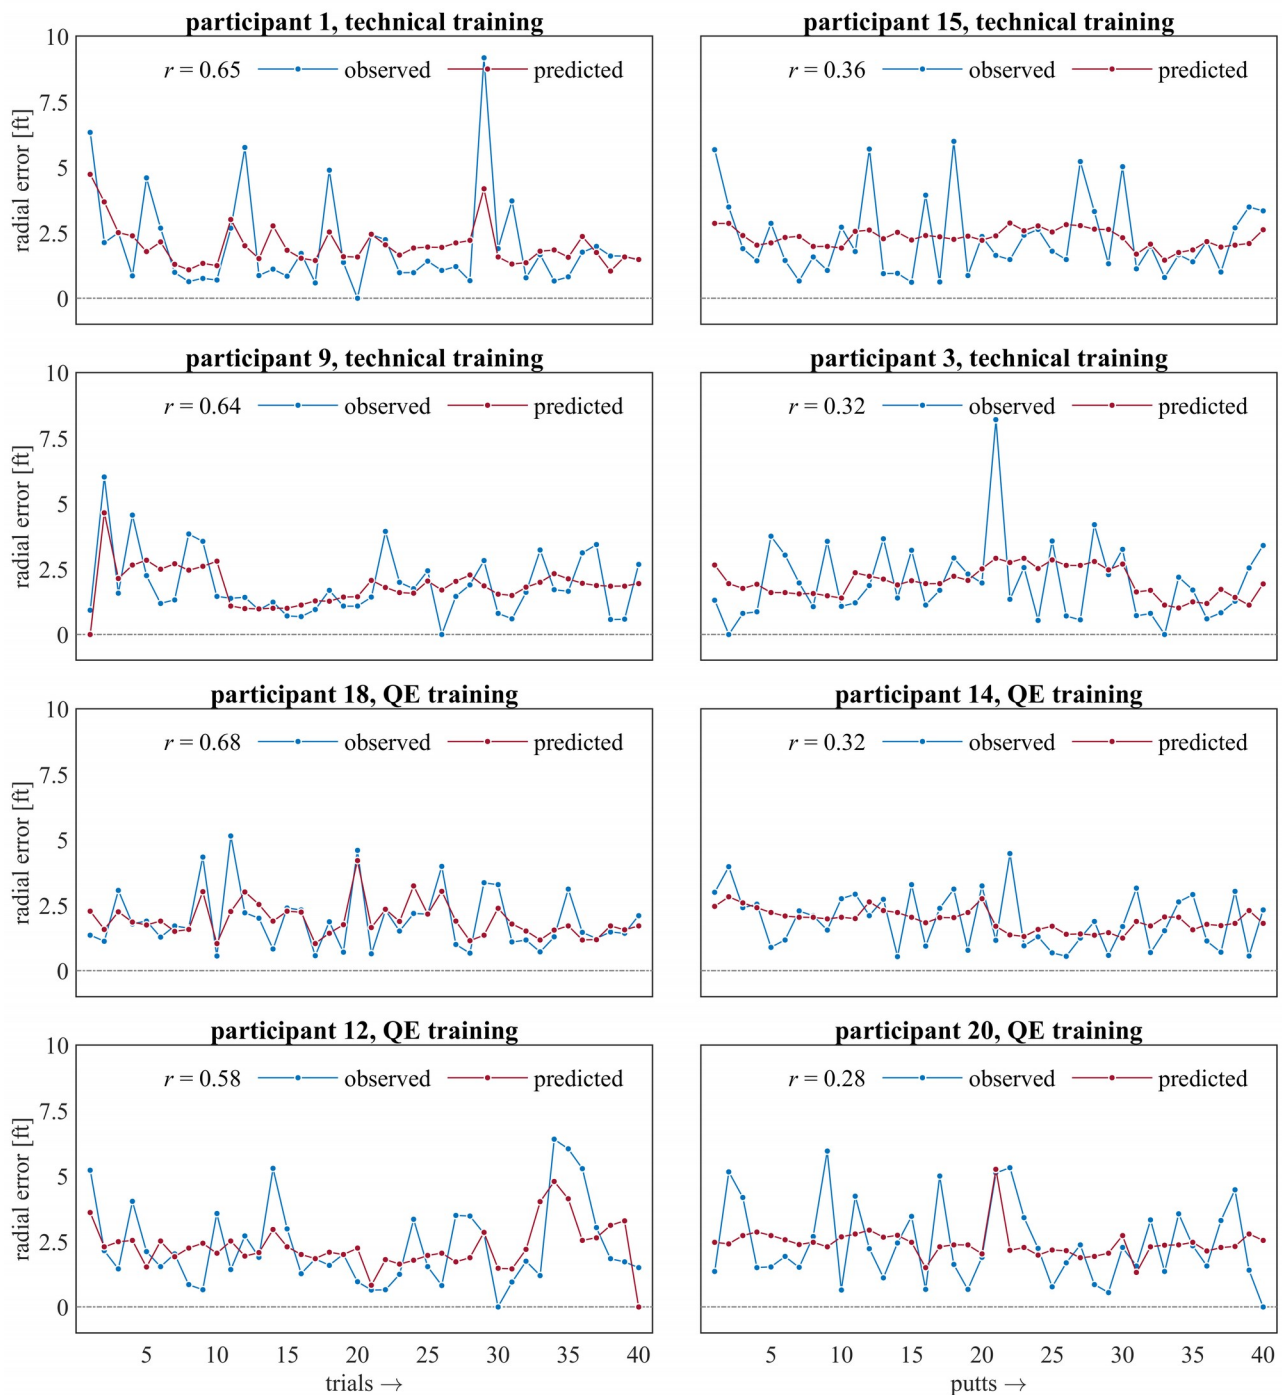

866 **Figure 5.** The observed trial-by-trial radial error and trial-by-trial model predictions on the same axis  
867 for four participants each from the technical (top four panels) and QE-trained (bottom four panels)  
868 groups, respectively. The representation includes two participants each with the highest (left panels)  
869 and lowest (right panels) Pearson's correlation coefficient  $r$  indicating the strength of relationship  
870 between the observed and predicted radial errors.

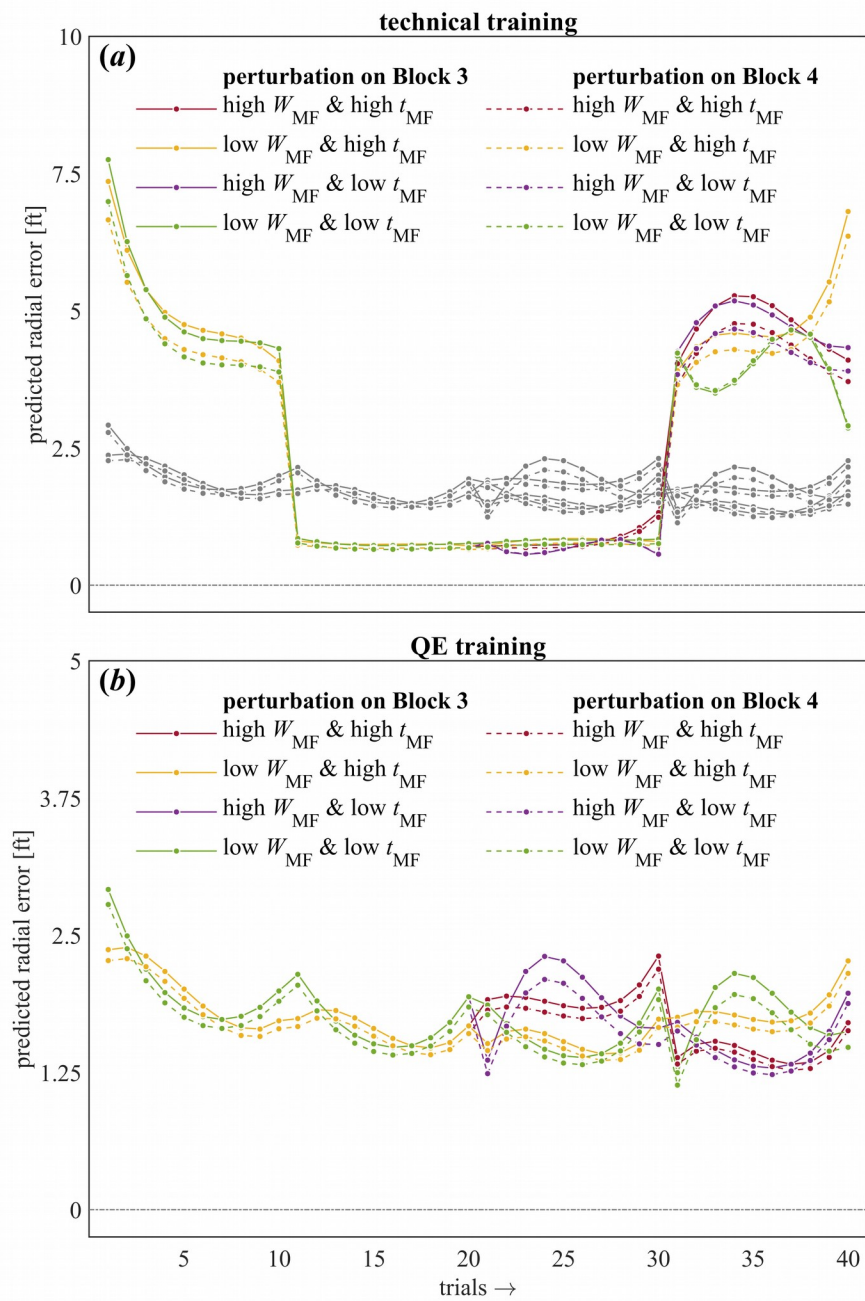

871 **Figure 6.** Trial-by-trial model predictions of radial error for the two participant groups. (a) Technical-  
872 trained group. (b) QE-trained group.

873 **Supplementary Table S1.** Subset of Poisson regression model output including main and interaction  
 874 effects of time and perturbation of eye height.

| <b>predictor</b>                                       | <b><i>b</i></b>        | <b><i>s.e.m.</i></b>  | <b><i>p</i><sup>*</sup></b> |
|--------------------------------------------------------|------------------------|-----------------------|-----------------------------|
| intercept                                              | 9.04×10 <sup>0</sup>   | 3.29×10 <sup>-1</sup> | < <b>0.0001</b>             |
| trial <sub>exp</sub> (Linear)                          | 4.70×10 <sup>1</sup>   | 2.26×10 <sup>0</sup>  | < <b>0.0001</b>             |
| trial <sub>exp</sub> (Quadratic)                       | 3.08×10 <sup>1</sup>   | 1.20×10 <sup>0</sup>  | < <b>0.0001</b>             |
| trial <sub>exp</sub> (Cubic)                           | -1.78×10 <sup>0</sup>  | 1.54×10 <sup>-1</sup> | < <b>0.0001</b>             |
| trial <sub>block</sub> (Linear)                        | 2.17×10 <sup>1</sup>   | 9.34×10 <sup>-1</sup> | < <b>0.0001</b>             |
| trial <sub>block</sub> (Quadratic)                     | 9.60×10 <sup>-1</sup>  | 2.63×10 <sup>-1</sup> | < <b>0.001</b>              |
| trial <sub>block</sub> (Cubic)                         | -1.62×10 <sup>0</sup>  | 2.57×10 <sup>-1</sup> | < <b>0.0001</b>             |
| block                                                  | -1.41×10 <sup>0</sup>  | 1.34×10 <sup>-1</sup> | < <b>0.0001</b>             |
| block × trial <sub>block</sub> (Linear)                | -1.36×10 <sup>1</sup>  | 5.83×10 <sup>-1</sup> | < <b>0.0001</b>             |
| block × trial <sub>block</sub> (Quadratic)             | -1.10×10 <sup>0</sup>  | 1.10×10 <sup>-1</sup> | < <b>0.001</b>              |
| block × trial <sub>block</sub> (Cubic)                 | 6.40×10 <sup>-1</sup>  | 1.08×10 <sup>-1</sup> | < <b>0.0001</b>             |
| QE                                                     | -4.40×10 <sup>0</sup>  | 4.81×10 <sup>-1</sup> | < <b>0.0001</b>             |
| QE × trial <sub>exp</sub> (Linear)                     | -6.07×10 <sup>1</sup>  | 3.54×10 <sup>0</sup>  | < <b>0.0001</b>             |
| QE × trial <sub>exp</sub> (Quadratic)                  | -3.21×10 <sup>1</sup>  | 1.86×10 <sup>0</sup>  | < <b>0.0001</b>             |
| QE × trial <sub>exp</sub> (Cubic)                      | 1.03×10 <sup>0</sup>   | 2.18×10 <sup>-1</sup> | < <b>0.0001</b>             |
| QE × trial <sub>block</sub> (Linear)                   | -2.41×10 <sup>1</sup>  | 1.41×10 <sup>0</sup>  | < <b>0.0001</b>             |
| QE × trial <sub>block</sub> (Quadratic)                | 9.35×10 <sup>-1</sup>  | 3.79×10 <sup>-1</sup> | < <b>0.05</b>               |
| QE × trial <sub>block</sub> (Cubic)                    | 2.24×10 <sup>0</sup>   | 3.54×10 <sup>-1</sup> | < <b>0.0001</b>             |
| QE × block                                             | 1.72×10 <sup>0</sup>   | 1.96×10 <sup>-1</sup> | < <b>0.0001</b>             |
| QE × block × trial <sub>block</sub> (Linear)           | 1.56×10 <sup>1</sup>   | 8.99×10 <sup>-1</sup> | < <b>0.0001</b>             |
| QE × block × trial <sub>block</sub> (Quadratic)        | 1.31×10 <sup>0</sup>   | 1.63×10 <sup>-1</sup> | < <b>0.0001</b>             |
| QE × block × trial <sub>block</sub> (Cubic)            | -5.57×10 <sup>-1</sup> | 1.54×10 <sup>-1</sup> | < <b>0.01</b>               |
| Perturbation                                           | 3.90×10 <sup>-2</sup>  | 3.01×10 <sup>-1</sup> | 0.90                        |
| QE × perturbation                                      | 8.73×10 <sup>-2</sup>  | 4.26×10 <sup>-1</sup> | 0.84                        |
| perturbation × trial <sub>block</sub> (Linear)         | 1.58×10 <sup>0</sup>   | 3.02×10 <sup>-1</sup> | < <b>0.0001</b>             |
| perturbation × trial <sub>block</sub> (Quadratic)      | 1.25×10 <sup>0</sup>   | 3.08×10 <sup>-1</sup> | < <b>0.001</b>              |
| perturbation × trial <sub>block</sub> (Cubic)          | -2.42×10 <sup>0</sup>  | 2.97×10 <sup>-1</sup> | < <b>0.0001</b>             |
| QE × perturbation × trial <sub>block</sub> (Linear)    | -1.16×10 <sup>0</sup>  | 4.44×10 <sup>-1</sup> | < <b>0.01</b>               |
| QE × perturbation × trial <sub>block</sub> (Quadratic) | -5.71×10 <sup>0</sup>  | 4.43×10 <sup>-1</sup> | < <b>0.0001</b>             |
| QE × perturbation × trial <sub>block</sub> (Cubic)     | 3.39×10 <sup>0</sup>   | 4.31×10 <sup>-1</sup> | < <b>0.0001</b>             |

875 \*boldfaced values indicate statistical significance at the alpha level of 0.05.
